1 **Full Title:** A community-level investigation of the yellow fever virus outbreak in South Omo  
2 Zone, South-West Ethiopia, 2012-2014

3  
4 **Short Title:** Investigation of a recent yellow fever outbreak in Ethiopia

5  
6 **Authors:**

7 Ranya Mulchandani<sup>1</sup>, Fekadu Massebo<sup>2</sup>, Fekadu Bocho<sup>2</sup>, Claire L Jeffries<sup>1</sup>, Thomas Walker<sup>1</sup>,  
8 Louisa A Messenger<sup>1\*</sup>

9  
10 **Author Affiliations:**

11 <sup>1</sup>Department of Disease Control, Faculty of Infectious Tropical Diseases, London School of  
12 Hygiene and Tropical Medicine, UK

13 <sup>2</sup>Department of Biology, Arba Minch University, Ethiopia

14  
15 \*Corresponding author

16  
17 **Abstract** (250-300 words)

18 **Background**

19 A yellow fever (YF) outbreak occurred in South Omo Zone, Ethiopia in 2012-2014. This study  
20 aimed to analyse historical epidemiological data, to assess the risk for future YF outbreaks  
21 through entomological surveillance, including mosquito species identification and molecular  
22 screening for arboviruses, and finally to determine the knowledge, attitudes and current  
23 preventative practices within the affected communities.

24  
25 **Methodology/Principal Findings**

26 From October 2012 to March 2014, 165 cases and 62 deaths were reported, principally in rural  
27 areas of South Ari region (83.6%), south-west Ethiopia. The majority of patients were 15-44  
28 years old (74.5%) and most case deaths were males (76%). Between June and August 2017,  
29 688 containers were sampled from across 177 households to identify key breeding sites for  
30 *Aedes* mosquitoes. *Ensete ventricosum* (“false banana”) was identified as the primary natural  
31 breeding site, and clay pots outside the home as the most productive artificial breeding site.  
32 Entomological risk indices from the majority of sites were classified as “high risk” for future  
33 outbreaks under current World Health Organization criteria. Adult trapping resulted in the  
34 identification of members of the *Aedes simpsoni* complex in and around households. Screening  
35 of adult females revealed no detection of yellow fever virus (YFV) or other arboviruses. 88%  
36 of 177 participants had heard of YF, however many participants easily confused transmission  
37 and symptoms of YF with malaria, which is also endemic in the area.

38  
39 **Conclusions/Significance**

40 Study results emphasise the need for further entomological studies to improve our  
41 understanding of local vector species and transmission dynamics. Disease surveillance systems  
42 and in-country laboratory capacity also need to be strengthened to facilitate more rapid  
43 responses to future YF outbreaks.

44  
45 **Author Summary** (150-200 words)

46 Despite the availability of a highly effective vaccine, yellow fever virus (YFV) remains an  
47 important public health problem across Africa and South America due to its high case-fatality  
48 rate. This study aimed to assess and reduce the risk for future outbreaks. During this study,  
49 historical data analysis was conducted to understand the epidemiology of the recent outbreak  
50 in 2012-2014. Entomological surveillance was also carried out, including both mosquito

51 species identification and molecular screening for arboviruses, as well as a household survey  
52 to understand the knowledge and attitudes towards yellow fever (YF) within the affected areas  
53 and to assess community-level practices for YF prevention. We found a high abundance of  
54 *Aedes simpsoni* complex in the context of low vaccination coverage. Community knowledge  
55 and practice levels were low for reducing potential breeding sites, highlighting the need for  
56 increased dissemination of information to community members on how to reduce their risk of  
57 exposure to mosquito vectors of arboviruses.

58

## 59 **Introduction**

60 Yellow fever virus (YFV) is a flavivirus transmitted primarily to humans and non-human  
61 primates through the bite of an infected female *Aedes* spp. or *Haemagogus* spp. mosquito (1).  
62 YFV is endemic to Africa and Latin America where it causes a spectrum of clinical symptoms  
63 ranging in severity from asymptomatic infection, mild illness with flu-like symptoms to severe  
64 disease including, fever, jaundice or haemorrhage and death (2). Despite the availability of a  
65 highly effective vaccine, YFV continues to occur in epidemic situations, and it is estimated to  
66 result in 130,000 human cases and 78,000 deaths annually in Africa alone (2). Since the 1980s,  
67 there has been an unprecedented rise in the number of large YFV outbreaks (3), including  
68 Angola and the Democratic Republic of Congo in 2016 which together became one of the  
69 largest outbreaks in Africa for more than 20 years (4–6). In early 2018, numerous cases were  
70 confirmed in Nigeria and Brazil, which was particularly concerning as they were being reported  
71 from areas previously not considered at-risk (7). YFV has also re-emerged across East Africa  
72 with outbreaks in Ethiopia in 2012 and Uganda in 2016 (8). Due to this global resurgence, YFV  
73 continues to be considered a significant threat to public health (9).

74 The resurgence of epidemic yellow fever (YF) and the increased risk of urban outbreaks is  
75 multi-factorial (10,11). Rapid urbanisation, population migration, climatic changes and  
76 increased travel have all been implicated in expanding the geographical range of YFV and  
77 driving mosquito vectors closer to human dwellings where unvaccinated individuals are often  
78 living in highly populated areas (12). A multi-faceted approach is necessary for YFV control,  
79 which includes strong laboratory and surveillance systems with rapid case reporting,  
80 appropriate case management, vector control and reactive and preventive vaccination  
81 campaigns (13).

82 Ethiopia has experienced numerous YFV outbreaks since the 1940s. Between 1960-1962, the  
83 largest YFV outbreak ever recorded in Africa occurred along the River Omo, Ethiopia (Gamo  
84 Gofa, Jinka and Kaffa regions) which resulted in approximately 200,000 human cases and  
85 30,000 deaths. In 1966, YFV appeared in Arba Minch, in an area previously unaffected in the  
86 1960 epidemic and therefore excluded from the mass vaccination campaign at the time. During  
87 this outbreak, 450 deaths were reported (2,200 human cases) and the outbreak was confirmed  
88 through serological and entomological testing (14). After almost a 50-year absence, YFV re-  
89 emerged in 2012. A reactive vaccination campaign commenced in June, 2013, which reached  
90 approximately 550,000 people across the at-risk population. There have been no further  
91 vaccination campaigns since this outbreak, and Ethiopia is one of the few remaining endemic  
92 countries that have not introduced the YF vaccine into their childhood immunization  
93 programme. Therefore, the country is classified as a top priority through the Eliminating  
94 Yellow Fever Epidemics (EYE) strategy, a coalition of partners led by the World Health  
95 Organization (WHO), UNICEF and Gavi, the Vaccine Alliance (15).

96 Knowledge, Attitudes and Practices (KAP) studies have been widely used to understand the  
97 community context of disease transmission, to help inform appropriate control and risk

98 communication activities, with an overall aim to reduce barriers to the prevention of infectious  
99 diseases. In Ethiopia, there is a considerable paucity of such data on YFV, nor had a YFV  
100 outbreak occurred in the region for almost 50 years. To guide appropriate, prospective disease  
101 control interventions, this study aimed to collect historical epidemiological information of the  
102 2012 YFV outbreak, to assess the risk for future outbreaks through entomological surveillance,  
103 including mosquito species identification and molecular screening for arboviruses, and finally  
104 to determine knowledge and attitudes towards YF within the affected communities following  
105 this outbreak and assess current community-level practices for YF prevention.

## 106 **Methods**

107

### 108 *Study location*

109 The study was conducted in South Omo Zone (SOZ), Ethiopia, which is located in south-west  
110 Ethiopia (Southern Nations Nationalities and People's Region – SNNPR) across 5 selected  
111 kebeles (villages), between June and August 2017 (Figure 1). Aykamer, Shepe, Arkisha (South  
112 Ari woreda (region)), Hana (Salamago woreda) and Besheda (Hammer woreda) kebeles were  
113 selected as representative sites which reported varying numbers of cases during the 2012-2014  
114 outbreak and were all targeted for vaccination during the emergency reactive campaign in  
115 2013.

116 **Figure 1:** Map of study sites in South Omo Zone (SOZ), Southern Nations Nationalities and  
117 People's Region (SNNPR), south-west Ethiopia.

### 118 *Historical clinical data collection*

119 In November 2012, cases of an unknown febrile illness were reported to the Public Health  
120 Emergency Management (PHEM) through the mandatory weekly reporting format for health  
121 extension workers (HEW) on all immediately reportable diseases. Symptoms were a  
122 combination of fever, headache, nausea, bloody vomiting, abdominal pain, joint pain and  
123 jaundice. A team from the SOZ Health Department, WHO Ethiopia Country Office and  
124 Ethiopian Public Health Institute (EPHI) were deployed to the field for a rapid risk assessment.  
125 The causative agent was confirmed as YFV, following serum sample analysis. WHO standard  
126 case definition was used during the field investigation, and further cases confirmed through  
127 epi-link. The line list of all suspected and confirmed cases during the outbreak was retrieved  
128 from the SOZ Health Department in June 2017, to conduct a full historical descriptive  
129 epidemiological analysis; an interim report detailing cases up to October 2013 was published  
130 in 2017 by Lilay *et al.* (16).

131

### 132 *Entomological investigation and sampling*

133 At each household premise, selected to participate in the KAP survey, immature *Aedes* spp.  
134 were sampled from all natural and artificial containers found around the home using a larval  
135 dipper. Only containers that contained water were included. An entomological survey was  
136 completed to define the type of container, its location, its usage and larval and pupal densities  
137 to calculate risk indices and to assess the most productive breeding sites. Any container that  
138 was found harbouring at least one larva or pupa of *Aedes* spp. was considered positive, and a  
139 sample of immature stages collected were reared to adulthood for subsequent morphological  
140 identification (17,18). The following risk indices were calculated:

141

142 *House Index (HI)* – the percentage of houses found positive for mosquito larvae or  
143 pupae.

144 *Container Index (CI)* – the percentage of containers found positive for mosquito larvae  
145 or pupae.

146 *Breteau Index (BI)* – the number of containers found positive for mosquito larvae and  
147 pupae per 100 houses surveyed.

148 *Pupal Demographic Index (PDI)* – number of pupae found per number of residents in  
149 the houses inspected.

150

151 Entomological indices were interpreted according to the WHO guidelines; a high risk of YFV  
152 transmission is  $HI > 35\%$ ,  $BI > 50$  or  $CI > 20\%$  and low risk is  $HI < 4\%$ ,  $CI < 3\%$  or  $BI < 5$  (19).  
153 The most productive containers were considered the types of water-holding containers where  
154  $> 70\%$  of all pupae were found (20).

155

156 A Prokopack aspirator was used to collect adult mosquitoes at each household, both inside and  
157 outside of the premises. Each location was sampled for a total of 15 minutes (50% inside, 50%  
158 outside) to ensure systematic sampling. Specimens were labelled with time, date and location  
159 of their collection and stored in RNAlater® (Sigma, UK) at 4°C or lower to prevent viral RNA  
160 degradation.

161

### 162 *Molecular species identification*

163 RNA was extracted from individual whole mosquitoes using QIAGEN RNeasy 96 kits  
164 according to manufacturer's instructions. RNA was eluted in 40 µL of RNase-free water and  
165 stored at -80°C. A QIAGEN QuantiTect Reverse Transcription kit was used to reverse  
166 transcribe RNA to generate cDNA from all RNA extracts according to the manufacturer's  
167 instructions. To determine the species of adult female *Aedes* collected in Shepe, Aykamer and  
168 Arkisha, a fragment of the ITS2 gene was sequenced (21). PCR products were separated and  
169 visualised using 2% E-Gel EX agarose gels (Invitrogen) with SYBR safe and an Invitrogen E-  
170 Gel iBase Real-Time Transilluminator. PCR products were submitted to Source BioScience  
171 (Source BioScience Plc, Nottingham, UK) for PCR reaction clean-up, followed by Sanger  
172 sequencing to generate both forward and reverse reads. Sequencing analysis was carried out in  
173 MEGA7 (22) as follows. Both chromatograms (forward and reverse traces) from each sample  
174 was manually checked, analysed, and edited as required, followed by alignment by ClustalW  
175 and checking to produce consensus sequences. Consensus sequences were used to perform  
176 nucleotide BLAST (NCBI) database queries and an alignment constructed to include all field  
177 sample consensus sequences; two consensus sequences from *Ae. bromeliae* specimens,  
178 generated by following the same procedure as the field samples; plus relevant sequences  
179 covering the region sequenced, obtained from GenBank. This alignment by ClustalW was used  
180 to produce a Maximum Likelihood (ML) phylogenetic tree based on the Tamura-Nei method  
181 (23).

182

### 183 *Arbovirus screening*

184 Screening for YFV and other major arboviruses of public health suspected or having the  
185 potential of being transmitted in the region (dengue virus (DENV), Zika virus (ZIKV),  
186 chikungunya virus (CHIKV), West Nile virus (WNV) and Rift Valley fever virus (RVFV))  
187 was undertaken using published real time PCR assays (Supplementary File S1). PCR reactions  
188 for all assays except ZIKV and WNV were prepared using 5 µL of QIAGEN SYBR Green  
189 Master mix, a final concentration of 1 µM of each primer, 1 µL of PCR grade water and 2 µL  
190 template cDNA, to a final reaction volume of 10 µL. Prepared reactions were run on a Roche  
191 LightCycler® 96 System and PCR cycling conditions are described in Supplementary File S1.  
192 Amplification was followed by a dissociation curve (95°C for 10 seconds, 65°C for 60 seconds  
193 and 97°C for 1 second) to ensure the correct target sequence was being amplified. ZIKV and

194 WNV screening was undertaken using a Taqman probe-based assay using 5 µL of QIAGEN  
195 QuantiTect probe master mix, a final concentration of 1 µM of each primer, 1 µL of PCR grade  
196 water and 2 µL template cDNA, to a final reaction volume of 10 µL. PCR results were analysed  
197 using the LightCycler® 96 software (Roche Diagnostics). Synthetic long oligonucleotide  
198 standards (Integrated DNA technologies) of the PCR product template sequence were  
199 generated in the absence of biological virus cDNA positive controls and each assay included  
200 negative (no template) controls.

201

#### 202 *Knowledge, Attitudes and Practices (KAP) study design and sample population*

203 180 KAP surveys were administered across the five sites during the study period. A full  
204 household list was gathered from each village health post and random sampling used to select  
205 households, using a random number generator. Sample size calculations were conducted in  
206 STATA/IC 14.2 using the *svysampsi* command for surveys with a dichotomous outcome  
207 variable, with a proportion of 0.9 assumed to have the expected outcome, an error rate of 5%,  
208 a response rate of 90%, and a 95% confidence interval.

209 The KAP survey was developed through adaptation of previous KAP surveys used for other  
210 arboviruses (DENV and ZIKV), as well as compilation of context specific questions following  
211 informal discussions with stakeholders in Ethiopia (24–27). The survey was semi-structured,  
212 including both open and closed-ended questions, and captured details on household  
213 characteristics (socio-economic status/education), past YFV infection, vaccination status and  
214 general *Aedes* spp. control practices (Supplementary File S2). The survey was structured into  
215 eight main sections: [1] socio-demographic characteristics of study participants; [2] knowledge  
216 of YF symptoms, signs and transmission modes; [3] attitudes towards YF; [4] preventative  
217 practices against YF; [5] sources of information regarding YF; [6] YF case finding; [7] YF  
218 vaccination coverage estimation; and [8] other epidemiological risk factor information.

219 The full questionnaire was first developed in English, translated into Amharic and re-translated  
220 back into English for analysis. Before its use in the study, the questionnaire was pilot tested  
221 among community members in Arkisha, who were not included in the final analysis.

#### 222 *KAP data collection and analysis*

223 At each study site, the questionnaire was conducted in Amharic (or local dialect if preferred by  
224 respondent) by a HEW, who was trained by an experienced interviewer from Jinka Town. None  
225 of the interviewers were told the correct results to avoid interview bias during data collection.  
226 The head of household was the main respondent, however when this was not possible, another  
227 member of the family was interviewed *in lieu*.

228 All completed household surveys were double-checked and verified on the same day for  
229 completeness and consistency. Data were interpreted taking into account informal  
230 conversations and observations in the community and hospital.

231 The KAP assessment was conducted using a scoring system. A participant's KAP score was  
232 calculated as the sum of their correct answers, where a correct answer was given a value of 1  
233 and an incorrect answer (including any answers “do not know” or “no answer”) the value of 0  
234 (25). The total possible score was 15 for Knowledge, 5 for Attitude and 8 for Practices.  
235 Respondents' levels were defined as “good” or “poor” based on a 75% cut-off threshold.  
236 Logistic regression was conducted in STATA/IC 14.2 to identify determinants for KAP levels.  
237 Independent variables included in the model were household location, YF vaccination status,  
238 education level and the age and sex of respondent.

239 *Ethical approval*

240 Ethical approval for the study was obtained from the London School of Hygiene and Tropical  
 241 Medicine (LSHTM; ref #12291) and Arba Minch University (AMU; ref #6008/111). An  
 242 invitation letter from AMU was taken to SOZ Health Department, who then provided an  
 243 invitation letter, which was delivered to the village health posts to gain permission to sample.  
 244 All participants were adults and gave full written informed consent. Confidentiality of all  
 245 respondents was assured by using unique study identifiers. Working closely with HEWs  
 246 ensured community acceptance and cooperation.

247 **Results**

248  
 249 *Epidemiological information*

250 Between November 2012 and March 2014, a total of 165 cases of YF were reported to PHEM,  
 251 including 62 deaths and 4 laboratory confirmed cases (with the other 161 suspected cases  
 252 defined through epi-link), in an entirely unvaccinated population. The index case was reported  
 253 from Geza and first developed symptoms between 12<sup>th</sup> and 23<sup>rd</sup> November, 2012. Laboratory  
 254 confirmation was on 7<sup>th</sup> May, 2013. The main peak of the outbreak occurred from March to  
 255 May, 2013, with the cases appearing to decline following the emergency vaccination campaign  
 256 which commenced on 10<sup>th</sup> June, 2013 (Figure 2).

257  
 258 **Figure 2:** Distribution of reported yellow fever cases by their date of onset, from November  
 259 2012 to January 2014 (n=165) in Southern Nations, Nationalities, and People’s Region  
 260 (SNNPR), Ethiopia.

261 \*YFV: Yellow fever virus.

262  
 263 The majority of cases were 15-44 year olds (75.8%), with males slightly more affected than  
 264 females, with a male to female case ratio of 1.4:1 (Table 1). Most case deaths were also in  
 265 males (76%), which resulted in a case fatality rate (CFR) of 48.5% compared to 22.1% in  
 266 females (Table 2). The overall CFR was 37.6%, with the majority of deaths occurring at the  
 267 start of the outbreak. 69% of reported deaths occurred in health facilities; the remaining 31%  
 268 were community deaths found through active case detection.

269  
 270 **Table 1:** Age, sex and residence of reported yellow fever (YF) cases during the YF outbreak  
 271 in Southern Nations, Nationalities, and People’s Region (SNNPR), Ethiopia (n=165).

272

|                  | Variable             | Number of suspected cases | Percentage (%) |     |
|------------------|----------------------|---------------------------|----------------|-----|
| <b>Age</b>       | 0-4                  | 5                         | 3.0            |     |
|                  | 5-14                 | 16                        | 9.7            |     |
|                  | 15-44                | 125                       | 75.8           |     |
|                  | 45+                  | 19                        | 11.5           |     |
| <b>Sex</b>       | Male                 | 97                        | 58.8           |     |
|                  | Female               | 68                        | 41.2           |     |
| <b>Residence</b> | South (Dehub) Ari*   | 123                       | 74.6           |     |
|                  | BenaTsemay           | 19                        | 11.5           |     |
|                  | Jinka Town           | 11                        | 6.7            |     |
|                  | Salamago*            | 3                         | 1.8            |     |
|                  | South Omo Zone (SOZ) | Malle                     | 3              | 1.8 |
|                  | Gnangatom            | 1                         | 0.6            |     |
|                  | Dasenech             | 1                         | 0.6            |     |

|                |                   |            |             |
|----------------|-------------------|------------|-------------|
|                | North (Semen) Ari | 0          | 0           |
|                | Hammer*           | 0          | 0           |
|                | <b>Total</b>      | <b>161</b> | <b>97.6</b> |
| Gamo Gofa Zone | Konso             | 2          | 1.2         |
|                | Geze Gofa         | 1          | 0.6         |
|                | Mirab Abaya       | 1          | 0.6         |
|                | <b>Total</b>      | <b>4</b>   | <b>2.4</b>  |

273 \*Contains one or more sampled kebele from this study

274

275 **Table 2:** Yellow fever status as of March 2014 by sex, outcome status, and respective case  
 276 fatality rate (CFR) in Southern Nations, Nationalities, and People's Region (SNNPR), Ethiopia  
 277 (n=165).

278

|               | No. alive (%) | No. dead (%) | CFR (%) |
|---------------|---------------|--------------|---------|
| <b>Female</b> | 53 (51.5)     | 15 (24.2)    | 22.1    |
| <b>Male</b>   | 50 (48.5)     | 47 (75.8)    | 48.5    |
| <b>Total</b>  | 103           | 62           | 37.6    |

279

280 74.6% of all cases were reported from rural kebeles (villages) in South Ari. Aykamer, Geza  
 281 and Shepe kebeles contributed 49% of all reported cases and 62% of reported cases within  
 282 South Ari woreda (Table 1 and Figure 3). Aykamer and Geza kebeles had the highest attack  
 283 rates (AR) at 103.2 and 104.7 per 10,000 cases respectively. On 10<sup>th</sup> June, 2013 the SOZ Health  
 284 Department began an emergency vaccination campaign which targeted 607,462 people (28).  
 285 HEWs and allied health professionals were able to reach 543,558 people and an overall  
 286 coverage estimate of 89% was reported from SOZ Health Department in March 2014.

287

288 **Figure 3:** Distribution and frequency of yellow fever cases in South Omo Zone, Ethiopia  
 289 (n=165).

290

291

### 292 *Entomological investigation*

293 A total of 688 containers containing water were inspected among 177 households. Overall 240  
 294 (34.9%) of the containers were classified as positive, i.e. contained at least one mosquito larva  
 295 or pupa, across a total of 105 positive households (59.3%). The majority of water-filled  
 296 containers were found outdoors and filled with rainwater. The locations and types of containers  
 297 across the kebeles varied, reflecting the differences in larval indices among study sites. No  
 298 larvae or pupae were found in any water-holding containers in Besheda. A sample of all  
 299 immature stages were reared to adulthood (Table 3). From Shepe, Arkisha and Aykamer, the  
 300 main species collected was *Aedes* spp., however from Hana a large proportion was *Culex* spp.  
 301 A small number of *Toxorhynchites* spp. larvae and pupae were identified in Shepe and  
 302 Aykamer.

303

304 **Table 3:** Species of mosquitoes from immature stages reared to adults across the sample sites.

305

|                            | Shepe    | Arkisha  | Aykamer  | Hana     | Besheda |
|----------------------------|----------|----------|----------|----------|---------|
| <i>Aedes</i> spp.          | 44 (76%) | 35 (90%) | 84 (76%) | 5 (19%)  | 0 (0%)  |
| <i>Culex</i> spp.          | 12 (21%) | 4 (10%)  | 23 (21%) | 22 (81%) | 0 (0%)  |
| <i>Toxorhynchites</i> spp. | 2 (3%)   | 0 (0%)   | 3 (3%)   | 0 (0%)   | 0 (0%)  |
| <b>Total</b>               | 49       | 37       | 110      | 27       | 0       |

306

307 In the highland area of South Ari, the false banana plant is ubiquitously found in close  
 308 proximity to the home and was the major site for immature *Aedes* spp. stages in Shepe (75%  
 309 of plants inspected were positive) and Aykamer (64% positive). The second most important  
 310 breeding sites in these two kebeles were discarded plastic and clay, which were commonly  
 311 observed outside the home (Figure 4). There was also a high coverage of mixed vegetation  
 312 close to the home, including sweet potato, maize and false banana, which were often the  
 313 locations of adult mosquito collections. By comparison, the homes in Besheda were often kept  
 314 completely clear of any containers, clutter or vegetation. It was very unusual to see any  
 315 containers outside of the home. In Shepe alone, 102 positive containers were identified,  
 316 followed by 94 in Aykamer, 24 in Hana, 20 in Arkisha and 0 in Besheda. The types of infested  
 317 water-holding containers varied between the sample sites depending on the local usage and  
 318 traditional practices (Table 4).

319

320 **Table 4:** Different types of containers inspected, including proportion found positive with  
 321 either mosquito larvae or pupae, and relative pupal contribution, across the sample kebeles in  
 322 South Omo Zone, Ethiopia, 2017.

323

|                                  | Type of container                        | No. of containers inspected | No. of positive containers* (%) | No. of pupae (% contribution) |
|----------------------------------|------------------------------------------|-----------------------------|---------------------------------|-------------------------------|
| <b>Natural breeding sites</b>    | <i>Ensete ventricosum</i> (False banana) | 220                         | 141 (64.2)                      | 179 (19.7)                    |
|                                  | <i>Musa</i> spp. plant (Banana)          | 28                          | 18 (64.3)                       | 19 (2.1)                      |
|                                  | Tree hole or tree trunk                  | 6                           | 3 (50.0)                        | 27 (3.0)                      |
|                                  | <i>Colocasia esculenta</i> (Taro)        | 1                           | 0 (0.0)                         | 0 (0.0)                       |
| <b>Artificial breeding sites</b> | Plastic jug                              | 101                         | 5 (4.9)                         | 3 (0.3)                       |
|                                  | Plastic drum / metal drum                | 110                         | 8 (7.3)                         | 51 (5.6)                      |
|                                  | Discarded plastic                        | 65                          | 14 (21.5)                       | 86 (9.5)                      |
|                                  | Discarded clay pot                       | 48                          | 9 (18.8)                        | 304 (33.5)                    |
|                                  | Clay pot                                 | 45                          | 10 (22.2)                       | 225 (24.8)                    |
|                                  | Plastic bowl                             | 23                          | 0 (0.0)                         | 0 (0.0)                       |
|                                  | Metal bowl                               | 27                          | 2 (7.4)                         | 3 (0.3)                       |
|                                  | Discarded tyre                           | 7                           | 4 (57.1)                        | 8 (0.9)                       |
|                                  | Discarded plastic shoe                   | 4                           | 2 (50.0)                        | 2 (0.2)                       |
|                                  | Water pump                               | 1                           | 1 (100.0)                       | 0 (0.0)                       |
|                                  | Discarded metal                          | 1                           | 0 (0.0)                         | 0 (0.0)                       |
|                                  | Glass bottle                             | 1                           | 1 (100.0)                       | 0 (0.0)                       |
| <b>Total</b>                     |                                          | 688                         | 34.9                            | 907 (100)                     |

324

\*presence of at least one larva and/or pupa.

325

326

327



328 **Figure 4:** Typical mosquito breeding sites identified in South Omo Zone, Ethiopia, 2017: (a)  
 329 Plastic drum (b) Metal drum (c) Plastic jug (d) Discarded plastic (e) Discarded clay pot (f) Clay  
 330 pot (g) Metal bowl (h) Discarded Tyre (i) False banana plant (j) Various discarded items outside  
 331 the home.

332  
 333 Table 5 shows the Breteau Index (BI), Container Index (CI), Pupal Demographic Index (PDI)  
 334 and Household Index (HI) for each study site. The highest HIs were recorded in Shepe (79.0%)  
 335 and Hana (57.1%); both villages were classified as high risk for YFV transmission (WHO  
 336 threshold of >35%). The highest CIs were in Shepe (57.9%) and Aykamer (75.4%), both of  
 337 which inferred a high risk (HI>50%). The BIs were higher than the WHO threshold across all  
 338 sample sites except Besheda (threshold of BI>20); indicating there is no evidence for YFV  
 339 transmission in Besheda as no immature stage was found and all indices were below the low  
 340 risk thresholds of HI<4%, CI<3% and BI<5. The PDI was highest in Aykamer (2.24), which  
 341 also had the highest AR (103.2 cases per 10,000 people) (19). There was no statistically  
 342 significant correlation between the traditional entomological indices and the AR. However,  
 343 there was strong positive correlation ( $r=0.9545$ ) between AR and PDI ( $p=0.0455$ ).

344  
 345 Screening individual adult female *Aedes* mosquitoes collected using aspiration (n=120 from  
 346 Shepe, n=12 from Aykamer, n=1 from Arkisha) for YFV and other major arboviruses revealed  
 347 no evidence of arbovirus infection. Molecular species identification was undertaken by  
 348 sequencing a fragment of the ITS2 gene for a sub-sample of specimens (approximately 10% of  
 349 the total number from each location) which included 12 individuals from Shepe, where the  
 350 majority of adult females were collected, 2 from Aykamer and 1 from Arkisha, in addition to  
 351 2 *Ae. bromeliae* specimens from Tanzania for comparison. Figure 5 shows that all specimens  
 352 collected in our study were phylogenetically similar to GenBank sequences from the *Ae.*  
 353 *simpsoni* complex, non-anthropophilic grouping from Mukwaya *et al.* 2000, indicating these  
 354 specimens are part of the *Ae. simpsoni* complex and group with *Ae. lili*. Consensus sequences  
 355 from this study have been submitted to GenBank (Accession numbers MH277621 –  
 356 MH277635).

357  
 358 **Table 5:** Distribution of entomological indices and yellow fever (YF) attack rates recorded  
 359 across the sample kebeles, South Omo Zone, Ethiopia, 2017.

| Woreda    | Kebele       | Total houses inspected | Household index (%) | Container index (%) | Pupal demographic index* | Breteau Index | YF attack rate <sup>^</sup> |
|-----------|--------------|------------------------|---------------------|---------------------|--------------------------|---------------|-----------------------------|
| South Ari | Shepe        | 43                     | 79.0                | 57.9                | 0.48                     | 237.2         | 35.5                        |
|           | Arkisha      | 26                     | 38.5                | 18.5                | 0.28                     | 76.9          | 9.81                        |
|           | Aykamer      | 65                     | 33.8                | 75.4                | 2.24                     | 144.6         | 103.2                       |
| Salamago  | Hana         | 21                     | 57.1                | 24.0                | 0.50                     | 114.3         | 3.2                         |
| Hammer    | Besheda      | 25                     | -                   | -                   | -                        | -             | -                           |
|           | <b>Total</b> | <b>180</b>             | <b>41.7</b>         | <b>35.2</b>         | <b>0.70</b>              | <b>114.6</b>  | <b>30.3</b>                 |

361 \*Number of pupae per person.

362 <sup>^</sup>Number of cases per 10,000 people.

363  
 364  
 365  
 366

367 **Figure 5:** Molecular phylogenetic analysis by Maximum Likelihood method  
 368 The evolutionary history was inferred using the Maximum Likelihood method based on the  
 369 Tamura-Nei model (23). The tree with the highest log likelihood (-587.45) is shown. The  
 370 percentage of trees in which the associated taxa clustered together is shown next to the  
 371 branches. Initial tree(s) for the heuristic search were obtained automatically by applying  
 372 Neighbor-Joining and BioNJ algorithms to a matrix of pairwise distances estimated using the  
 373 Maximum Composite Likelihood (MCL) approach, and then selecting the topology with  
 374 superior log likelihood value. The tree is drawn to scale, with branch lengths representing the  
 375 number of substitutions per site. The analysis involved 41 nucleotide sequences. Codon  
 376 positions included were 1st+2nd+3rd+Noncoding. All positions containing gaps and missing  
 377 data were eliminated. There were a total of 230 positions in the final dataset. Evolutionary  
 378 analyses were conducted in MEGA7(22). Accession numbers for all GenBank sequences  
 379 included are shown.

- 380 ● Consensus sequences from field specimens, labelled according to site of collection with  
 381 newly generated Accession numbers included in brackets (ETH; Ethiopia, SHP; Shepe, AYK;  
 382 Aykamer, ARK; Arkisha).
- 383 ■ GenBank sequences of *Ae. simpsoni* complex, non-anthropophilic grouping from Mukwaya  
 384 *et al.* 2000 (29).
- 385 ■ GenBank sequences of *Ae. simpsoni* complex, anthropophilic grouping from Mukwaya *et al.*  
 386 2000 (29), in addition to other *Ae. simpsoni* complex and *Ae. bromeliae* GenBank sequences.
- 387 ▲ Consensus sequences from *Ae. bromeliae* specimens generated alongside field specimen  
 388 sequences.
- 389 ◆ GenBank sequences of *Ae. aegypti*.
- 390 ◆ GenBank sequence of *Ae. metallicus*.

---

391  
392

#### 393 *Household and individual characteristics*

394 The KAP respondents comprised of 101 (56.1%) females and 79 (43.9%) males, with 111  
 395 (62.3%) between 20-34 years of age (Table 6). The majority either had no education or primary  
 396 school level (86.6%), while only 5.6% had achieved a higher education level. Among all  
 397 respondents, 142 (78.9%) were farmers, while the remaining 38 (21.1%) were combinations of  
 398 other professions.

399 **Table 6:** Demographic characteristics of study respondents to KAP household questionnaire  
 400 in South Omo Zone, Ethiopia (n=180).

401

|                       | Variable         | Frequency | Percentage % |
|-----------------------|------------------|-----------|--------------|
| <b>Sex</b>            | Male             | 79        | 43.9         |
|                       | Female           | 101       | 56.1         |
| <b>Age (years)</b>    | <20              | 5         | 2.8          |
|                       | 20-24            | 23        | 12.8         |
|                       | 25-29            | 39        | 21.7         |
|                       | 30-34            | 50        | 27.8         |
|                       | 35-39            | 33        | 18.2         |
|                       | >40              | 30        | 16.7         |
| <b>Education</b>      | None             | 96        | 53.3         |
|                       | Primary School   | 60        | 33.3         |
|                       | Secondary School | 14        | 7.8          |
|                       | Higher Education | 10        | 5.6          |
| <b>Marital Status</b> | Married          | 152       | 84.4         |

|                                       |               |     |      |
|---------------------------------------|---------------|-----|------|
|                                       | Single        | 12  | 6.7  |
|                                       | Divorced      | 2   | 1.1  |
|                                       | Widowed       | 14  | 7.8  |
| <b>Occupation</b>                     | Unemployed    | 14  | 7.8  |
|                                       | Farmer        | 142 | 78.9 |
|                                       | Shopkeeper    | 1   | 0.6  |
|                                       | Forest-worker | 1   | 0.6  |
|                                       | Trader        | 4   | 2.2  |
|                                       | Teacher       | 3   | 1.6  |
|                                       | Student       | 6   | 3.3  |
|                                       | Other         | 9   | 5.0  |
| <b>No. of people in the household</b> | <4            | 26  | 14.4 |
|                                       | 4             | 43  | 23.9 |
|                                       | 5             | 29  | 16.1 |
|                                       | 6             | 40  | 22.2 |
|                                       | 7             | 19  | 10.6 |
|                                       | >7            | 23  | 12.8 |

402

403 *Knowledge of YF*

404 158 (87.8%) of the respondents had previously heard of YF, with the majority able to identify  
 405 the general symptoms of YF, including fever (82.2%) and headache (82.2%) (Table 7).  
 406 However, fewer participants were able to identify more specific YF signs and symptoms,  
 407 including jaundice (61.7%), muscle pain (74.5%) and bloody vomiting (56.1%). Most  
 408 participants stated that mosquitoes transmitted YFV (82.8%) (Table 7). However, knowledge  
 409 levels were lower concerning which mosquito species transmitted the diseases, with only 54  
 410 (30%) aware that it was different species to those capable of transmitting malaria. Many  
 411 respondents (57.2%) affirmed that YFV could be transmitted through ordinary person to person  
 412 contact, although knowledge was higher that it is not possible to transmit YFV via food or  
 413 water (62.8%). Many thought YF mosquitoes were most likely to bite at night time (58.9%).  
 414 The majority of respondents knew that mosquitoes could breed in standing water (83.9%) but  
 415 much fewer were aware that this was possible inside the home (46.7%). 138 (76.7%) agreed  
 416 that removing or covering standing water helps to prevent mosquito breeding and 145 (80.6%)  
 417 agreed that pouring chemical into standing water was effective at killing mosquito larvae.

418 **Table 7:** Knowledge of yellow fever (YF) signs, symptoms and transmission modes among  
 419 study respondents in South Omo Zone, Ethiopia, 2017 (n=180).

| <b>KNOWLEDGE</b>                       | Frequency | Percentage % |
|----------------------------------------|-----------|--------------|
| <b>Have you heard of yellow fever?</b> |           |              |
| Yes                                    | 158       | 87.8         |
| No                                     | 22        | 12.2         |
| <b>SIGNS AND SYMPTOMS</b>              |           |              |
| <b>Is fever a symptom of YF?</b>       |           |              |
| Yes                                    | 148       | 82.2         |
| No                                     | 8         | 4.5          |
| Don't know                             | 2         | 1.1          |
| No answer                              | 22        | 12.2         |
| <b>Is headache a symptom of YF?</b>    |           |              |
| Yes                                    | 148       | 82.2         |
| No                                     | 8         | 4.5          |

|                                               |     |      |
|-----------------------------------------------|-----|------|
| <b>Don't know</b>                             | 2   | 1.1  |
| <b>No answer</b>                              | 22  | 12.2 |
| <b>Is jaundice a symptom of yellow fever?</b> |     |      |
| <b>Yes</b>                                    | 111 | 61.7 |
| <b>No</b>                                     | 37  | 20.5 |
| <b>Don't know</b>                             | 10  | 5.6  |
| <b>No answer</b>                              | 22  | 12.2 |
| <b>Is muscle pain a symptom of YF?</b>        |     |      |
| <b>Yes</b>                                    | 134 | 74.5 |
| <b>No</b>                                     | 20  | 11.1 |
| <b>Don't know</b>                             | 4   | 2.2  |
| <b>No answer</b>                              | 22  | 12.2 |
| <b>Is rash a symptom of YF?</b>               |     |      |
| <b>Yes</b>                                    | 97  | 53.9 |
| <b>No</b>                                     | 50  | 27.8 |
| <b>Don't know</b>                             | 11  | 6.1  |
| <b>No answer</b>                              | 22  | 12.2 |
| <b>Is bloody vomiting a symptom of YF?</b>    |     |      |
| <b>Yes</b>                                    | 101 | 56.1 |
| <b>No</b>                                     | 29  | 16.1 |
| <b>Don't know</b>                             | 28  | 15.6 |
| <b>No answer</b>                              | 22  | 12.2 |

420

| <b>TRANSMISSION</b>                                        | Frequency | Percentage % |
|------------------------------------------------------------|-----------|--------------|
| <b>Do mosquitoes transmit YF?</b>                          |           |              |
| <b>Yes</b>                                                 | 149       | 82.8         |
| <b>No</b>                                                  | 9         | 5.0          |
| <b>Don't know</b>                                          | 3         | 1.7          |
| <b>No answer</b>                                           | 19        | 10.5         |
| <b>Are they the same mosquitoes that transmit malaria?</b> |           |              |
| <b>Yes</b>                                                 | 81        | 45.0         |
| <b>No</b>                                                  | 54        | 30.0         |
| <b>Don't know</b>                                          | 26        | 14.4         |
| <b>No answer</b>                                           | 19        | 10.6         |
| <b>Does ordinary person to person contact transmit YF?</b> |           |              |
| <b>Yes</b>                                                 | 103       | 57.2         |
| <b>No</b>                                                  | 46        | 25.6         |
| <b>Don't know</b>                                          | 12        | 6.6          |
| <b>No answer</b>                                           | 19        | 10.6         |
| <b>Is YF transmitted through food and water?</b>           |           |              |
| <b>Yes</b>                                                 | 38        | 21.1         |
| <b>No</b>                                                  | 113       | 62.8         |
| <b>Don't know</b>                                          | 10        | 5.5          |
| <b>No answer</b>                                           | 19        | 10.6         |
| <b>When are the YF mosquitoes most likely to bite?</b>     |           |              |
| <b>Night</b>                                               | 106       | 58.9         |
| <b>Day</b>                                                 | 16        | 8.9          |
| <b>Both</b>                                                | 39        | 21.6         |

|                                                                              |     |      |
|------------------------------------------------------------------------------|-----|------|
| <b>Don't know</b>                                                            | 19  | 10.6 |
| <b>Do the YF mosquitoes breed in standing water?</b>                         |     |      |
| <b>Yes</b>                                                                   | 151 | 83.9 |
| <b>No</b>                                                                    | 2   | 1.1  |
| <b>Don't know</b>                                                            | 8   | 4.4  |
| <b>No answer</b>                                                             | 19  | 10.6 |
| <b>Can mosquitoes breed inside the home?</b>                                 |     |      |
| <b>Yes</b>                                                                   | 84  | 46.7 |
| <b>No</b>                                                                    | 64  | 35.6 |
| <b>Don't know</b>                                                            | 13  | 7.1  |
| <b>No answer</b>                                                             | 19  | 10.6 |
| <b>Does removal or covering of standing water prevent mosquito breeding?</b> |     |      |
| <b>Yes</b>                                                                   | 138 | 76.7 |
| <b>No</b>                                                                    | 10  | 5.5  |
| <b>Don't know</b>                                                            | 13  | 7.2  |
| <b>No answer</b>                                                             | 19  | 10.6 |
| <b>Can pouring chemical into standing water kill mosquito larvae?</b>        |     |      |
| <b>Yes</b>                                                                   | 145 | 80.6 |
| <b>No</b>                                                                    | 6   | 3.3  |
| <b>Don't know</b>                                                            | 10  | 5.5  |
| <b>No answer</b>                                                             | 19  | 10.6 |

421

422 *Attitudes towards prevention and control of YF*

423 147 (81.7%) of study respondents stated that YF is a serious illness, with the reasons for being  
 424 so including bloody vomiting, high CFR, and becoming more dangerous without early  
 425 treatment (Table 8). Respondents agreed that both controlling breeding sites of mosquitoes  
 426 (87.2%) and vaccination (75.6%) were good strategies to prevent YF, and that communities  
 427 have a role to play in controlling these mosquitoes (86.7%). Fewer participants (56.1%) thought  
 428 that it was the health post's responsibility to prevent YF.

429 **Table 8:** Attitudes of study respondents towards yellow fever (YF) in South Omo Zone,  
 430 Ethiopia, 2017 (n=180).

| <b>ATTITUDES</b>                                                                                 | <b>Frequency</b> | <b>Percentage %</b> |
|--------------------------------------------------------------------------------------------------|------------------|---------------------|
| <b>Is yellow fever a serious illness?</b>                                                        |                  |                     |
| <b>Yes</b>                                                                                       | 147              | 81.7                |
| <b>No</b>                                                                                        | 16               | 8.9                 |
| <b>No answer</b>                                                                                 | 17               | 9.4                 |
| <b>Is controlling the breeding sites of mosquitoes a good strategy to prevent YF?</b>            |                  |                     |
| <b>Yes</b>                                                                                       | 157              | 87.2                |
| <b>No</b>                                                                                        | 7                | 3.9                 |
| <b>No answer</b>                                                                                 | 16               | 8.9                 |
| <b>Is vaccination a good strategy to prevent YF?</b>                                             |                  |                     |
| <b>Yes</b>                                                                                       | 136              | 75.6                |
| <b>No</b>                                                                                        | 28               | 15.6                |
| <b>No answer</b>                                                                                 | 16               | 8.8                 |
| <b>Do you think communities should actively participate in controlling the mosquitoes of YF?</b> |                  |                     |

|                                                                                        |     |      |
|----------------------------------------------------------------------------------------|-----|------|
| <b>Yes</b>                                                                             | 156 | 86.7 |
| <b>No</b>                                                                              | 8   | 4.4  |
| <b>No answer</b>                                                                       | 16  | 8.8  |
| <b>Do you think its responsibility of the health office to control and prevent YF?</b> |     |      |
| <b>Yes</b>                                                                             | 101 | 56.1 |
| <b>No</b>                                                                              | 63  | 35.0 |
| <b>No answer</b>                                                                       | 16  | 8.9  |

431

432 *Practices regarding YF prevention*

433 166 (92%) respondents self-reported actively reducing mosquitoes near their homes, through  
 434 preventing standing water (89.4%), using insecticide-treated nets in the home (85.6%), using  
 435 smoke to drive mosquitoes away (86.7%) and wearing clothes to prevent mosquito bites  
 436 (92.8%) (Table 9). 145 (81%) respondents reported that the government had come to their  
 437 houses to spray insecticides on their walls in the past. The majority of respondents reported  
 438 covering water containers in the home (90.0%), with many claiming to clean their water filled  
 439 containers every day (37.3%) or once a week (51.7%). Most respondents reported turning their  
 440 containers upside down to avoid water collection (84.4%).

441 *Sources of information about YF*

442 The majority of respondents (76.8%) reported receiving information solely from their HEWs,  
 443 particularly as most live in rural kebeles without access to radio or TV. A large proportion of  
 444 respondents knew of neighbours or family members who had YF in the past, with many  
 445 reporting cases that occurred 5-6 years ago. However, individuals often cited cases occurring  
 446 between 2014 and 2017, particularly in Arkisha where 64% of respondents reported knowing  
 447 someone who had YF in 2016 or 2017. 60% of respondents from Arkisha self-reported having  
 448 suffered from YF themselves, while no one in Besheda reported any cases of YF for either  
 449 themselves or anyone else they knew.

450 Self-reported vaccination history, collected alongside household KAP survey data, reported  
 451 only 62% of respondents having been vaccinated in the YF campaign in 2013, compared to the  
 452 89% coverage estimated by SOZ Health Department by March 2014. All of those who reported  
 453 being vaccinated, had done so at their kebele health post in 2013.

454 21 (11.7%) study respondents reported working in Mago National Park or other forest areas,  
 455 particularly from Arkisha which borders the park. 45 (25%) people reported having contact  
 456 with monkeys near to their homes. From the rural kebeles, little migration had occurred,  
 457 however, in Hana, almost every respondent (90.5%) had moved to the region for work, in  
 458 particular to work at the Omo Kuraz Sugar Factory project, or to serve this growing urban  
 459 community.

460 **Table 9:** Practices for yellow fever (YF) prevention and mosquito control of study respondents  
 461 in South Omo Zone, Ethiopia, 2017 (n=180).

| <b>PREVENTING MOSQUITO-MAN CONTACT</b>                                    | <b>Frequency</b> | <b>Percentage %</b> |
|---------------------------------------------------------------------------|------------------|---------------------|
| <b>Do you do anything to reduce mosquitoes?</b>                           |                  |                     |
| <b>Yes</b>                                                                | 166              | 92.2                |
| <b>No</b>                                                                 | 14               | 7.8                 |
| <b>Has the government come to spray insecticide to reduce mosquitoes?</b> |                  |                     |
| <b>Yes</b>                                                                | 145              | 80.6                |

|                                                                                       |     |      |
|---------------------------------------------------------------------------------------|-----|------|
| No                                                                                    | 35  | 19.4 |
| <b>Do you prevent standing water around the house to reduce mosquitoes?</b>           |     |      |
| Yes                                                                                   | 161 | 89.4 |
| No                                                                                    | 19  | 10.6 |
| <b>Do you use insecticide treated nets to protect against mosquitoes in the home?</b> |     |      |
| Yes                                                                                   | 154 | 85.6 |
| No                                                                                    | 26  | 14.4 |
| <b>Do you use smoke to drive mosquitoes away?</b>                                     |     |      |
| Yes                                                                                   | 156 | 86.7 |
| No                                                                                    | 24  | 13.3 |
| <b>Do you cover your body with clothes to prevent against mosquito bites?</b>         |     |      |
| Yes                                                                                   | 167 | 92.8 |
| No                                                                                    | 13  | 7.2  |
| <b>ELIMINATING BREEDING SITES</b>                                                     |     |      |
| <b>Do you cover water containers in the home?</b>                                     |     |      |
| Yes                                                                                   | 162 | 90.0 |
| No                                                                                    | 18  | 10.0 |
| <b>How often do you clean water filled containers and ditches around the house?</b>   |     |      |
| Everyday                                                                              | 67  | 37.3 |
| Once a week                                                                           | 93  | 51.7 |
| Once a month                                                                          | 9   | 5.0  |
| Never                                                                                 | 7   | 3.9  |
| No answer                                                                             | 4   | 2.1  |
| <b>Do you turn containers upside down to avoid water collection?</b>                  |     |      |
| Yes                                                                                   | 152 | 84.4 |
| No                                                                                    | 27  | 15.0 |
| No answer                                                                             | 1   | 0.6  |

462

463 *Predictors for knowledge, attitudes and practices*

464 Regarding KAP scores, 53.3% of participants achieved a good (at least 75%) knowledge score,  
 465 78.9% achieved a good attitude score and 70.6% a good practices score. In the univariate  
 466 analysis of the association between KAP score and a number of independent variables  
 467 (including socio-economic variables, past YFV infection and YF vaccination status), there was  
 468 increased odds of having good knowledge if the respondent lived in Arkisha (OR:13.88; 95%  
 469 CI 4.18-46.02), Aykamer (OR: 18.89; 95% CI 6.74-52.94), Hana (OR: 7.40; 95% CI 2.22-  
 470 24.65) and Besheda (OR:5.22; 95% CI 1.61-16.95), compared to a respondent living in Shepe  
 471 (Table 10).

472 This analysis also predicted increased odds of having a good attitude score if the respondent  
 473 was female (OR: 2.71; 95% 1.29-5.67), and by household location, with a decreased odds of  
 474 good attitude by lack of YF vaccination (OR: 0.40, 95% CI 0.19-0.83) (Table 10). A good  
 475 practice level score was also found to be predicted by YF vaccination status (OR: 0.37, 95%  
 476 0.19-0.71). After adjusting for potential confounders in a multivariate analysis, sex was no  
 477 longer found to be a significant predictor of attitude levels; or vaccination status on knowledge  
 478 level (Table 10).

479 The correlation of KAP scores revealed a slight positive correlation between knowledge and  
 480 attitude scores ( $r=0.41$ ,  $p<0.001$ ); while no significant correlation was found between  
 481 knowledge and practices ( $p=0.373$ ), or attitude and practices ( $p=0.471$ ) (Table 11).

482 **Table 10:** Multivariate logistic regression showing predictors of knowledge, attitude and  
 483 practices levels (good vs. bad).

| Dependent variable | Independent variable | Categories           | OR (95% CI)            | aOR* (95% CI)           | p-value |
|--------------------|----------------------|----------------------|------------------------|-------------------------|---------|
| Knowledge level    | Vaccination status   | Yes                  | 1                      | 1                       |         |
|                    |                      | No                   | 1.17<br>(0.64, 2.16)   | 0.60<br>(0.26, 1.39)    | 0.231   |
|                    | Household location   | Shepe                | 1                      | 1                       |         |
|                    |                      | Arkisha              | 13.88<br>(4.18, 46.02) | 48.97<br>(9.40, 255.12) | <0.001  |
|                    |                      | Aykamer              | 18.89<br>(6.74, 52.94) | 31.97<br>(8.15, 120.62) | <0.001  |
|                    |                      | Hana                 | 7.40<br>(2.22, 24.65)  | 25.35<br>(4.75, 135.46) | <0.001  |
|                    |                      | Besheda              | 5.22<br>(1.61, 16.95)  | 9.71<br>(2.07, 45.53)   | 0.004   |
| Attitude level     | Sex                  | Male                 | 1                      | 1                       |         |
|                    |                      | Female               | 2.71<br>(1.29, 5.67)   | 2.33<br>(0.79, 6.84)    | 0.124   |
|                    | Vaccination status   | Yes                  | 1                      | 1                       |         |
|                    |                      | No                   | 0.40<br>(0.19, 0.83)   | 0.21<br>(0.06, 0.68)    | 0.009   |
|                    | Household location   | Shepe                | 1                      | 1                       |         |
|                    |                      | Arkisha              | 3.33<br>(1.05, 10.46)  | 14.03<br>(2.52, 78.25)  | 0.003   |
|                    |                      | Aykamer              | 9.50<br>(3.18, 28.34)  | 27.85<br>(5.17, 150.03) | <0.001  |
| Hana               |                      | 1.14<br>(0.40, 3.24) | 2.19<br>(0.46, 10.34)  | 0.324                   |         |
| Besheda            |                      | -                    | -                      | -                       |         |
| Practice level     | Vaccination status   | Yes                  | 1                      | 1                       |         |
|                    |                      | No                   | 0.37<br>(0.19, 0.71)   | 0.34<br>(0.15, 0.80)    | 0.014   |
|                    | Household location   | Shepe                | 1                      | 1                       |         |
|                    |                      | Arkisha              | 0.44<br>(0.14, 1.40)   | 0.95<br>(0.23, 3.84)    | 0.941   |
|                    |                      | Aykamer              | 0.26<br>(0.10, 0.66)   | 0.26<br>(0.08, 0.80)    | 0.019   |
|                    |                      | Hana                 | 0.42                   | 0.98                    | 0.979   |



|         |              |               |       |
|---------|--------------|---------------|-------|
|         | (0.12, 1.40) | (0.20, 4.80)  |       |
| Besheda | 1.36         | 2.07          | 0.382 |
|         | (0.32, 5.84) | (0.41, 10.54) |       |

484 OR: Odds Ratio

485 aOR: adjusted Odds Ratio

486 CI: Confidence Intervals

487 \*Adjusted for age, sex, marital status, education level, vaccination status and household  
488 location.

489

490

491 **Table 11:** Correlation between knowledge, attitude and practices scores.

| Variables           | Correlation co-efficient ( <i>r</i> ) | p-value |
|---------------------|---------------------------------------|---------|
| Knowledge-Attitudes | 0.41 (0.24, 0.58)                     | <0.001  |
| Knowledge-Practices | -0.07 (-0.23, 0.09)                   | 0.373   |
| Attitudes-Practices | 0.05 (-0.08, 0.18)                    | 0.471   |

492

## 493 Discussion

494

495 To reduce the risk of future YFV and other arboviral disease outbreaks, it is important to  
496 understand past outbreaks and community perceptions and preventative practices in at-risk  
497 areas, to guide appropriate interventions and policy recommendations. From 2012-2014, 165  
498 cases were reported in SOZ, including 62 fatalities. YF was unfamiliar to health professionals  
499 at this time as it was an unexpected outbreak of a disease that had not been seen locally since  
500 1962 (30). With the majority of cases identified in rural kebeles, it is highly likely that the  
501 prevalence and severity of the outbreak was under-reported.

502

503 The epidemiological data indicate that the case number was higher in males, which is in line  
504 with previous YF outbreaks, such as the 1960 outbreak in Ethiopia which had a male:female  
505 case ratio of 1.6:1 (31) as well as in Uganda (2011) where the sex-specific AR was 16.5 (male)  
506 vs. 9.6 (female) per 100,000 (32). In SOZ, the CFR in males (48.5%) was almost double  
507 compared to females (22.1%), which was consistent with the YF outbreak in Uganda (29.6%  
508 in males compared to 17.8% in females) and may be explained by males often reporting later  
509 (and sicker) to health facilities, due to underestimating the severity of the disease at symptom  
510 onset. By contrast, during outbreaks in The Gambia (1978-1979) and Ghana (1969-1970),  
511 children <15 years of age were the most affected, due to the stopping of routine mass YF  
512 vaccination campaigns in the early 1960s (33).

513

514 The majority of cases were seen in 15-44 year olds (75.8%) who may have been infected while  
515 working outdoors during the day and dusk, the peak mosquito biting times; a risk factor also  
516 described in Kenya (1992-1993) where 81% of cases were <40 years old (34). The overall CFR  
517 in SOZ was 37.6%, which is higher than in the Darfur epidemic of 2012 (20.3%) and in Uganda  
518 in 2011 (24.9%) (33). Only 4 cases were reported from outside of SOZ, which may be from  
519 individuals visiting the region, e.g. becoming infected at the weekly Saturday market in Jinka  
520 Town; rather than autochthonous YFV transmission. However, with reports of *Aedes* spp. in  
521 Gamo Gofa (14), the potential for local transmission is possible (as seen in 1966, a region  
522 previously unaffected during the 1960-1962 outbreak). Areas outside of SOZ were not included  
523 in the mass vaccination campaign of 2013, leaving this population immunologically-vulnerable  
524 to future outbreaks.

525

526 The mass emergency vaccination campaign of 2013 appeared to curb the outbreak as the  
527 number of cases declined post-campaign and a high administrative vaccination coverage was  
528 reported. However, cases were still appearing in early 2014: for example, 3 cases in Malle  
529 worda (previously unaffected during the peak period of the outbreak) were detected in  
530 individuals who had not been vaccinated (35), and there are informal reports from South Omo  
531 and Arba Minch of recent YF cases; highlighting the urgent need for a follow up vaccination  
532 campaign and strengthened case investigation. The peak of the reported cases occurred in April  
533 and May of 2013, which could be explained by the hot and wet climate in the region during  
534 this time, encouraging mosquito breeding. However, this also coincided with the YFV  
535 laboratory confirmation which increased disease awareness among community and health  
536 professionals.

537  
538 In early 2014, the EPHI conducted a training for health managers at regional and district levels  
539 on YF. However, by this time, the peak of the outbreak was already over. In addition,  
540 surveillance was slow and took almost 8 months to confirm the outbreak. These delays were  
541 due to a combination of a lack of in-country laboratory diagnostics (requiring samples to be  
542 sent to the Regional Reference Laboratory at Institut Pasteur, Dakar for analysis), non-  
543 specificity of the case definition, and misdiagnosis by clinicians (16)(36). Through informal  
544 discussions, it was noted that most health professionals (particularly doctors) working in Jinka  
545 Hospital rotate to new hospitals after 2-3 years. Many of the doctors currently at the hospital  
546 did not know the signs, symptoms or treatment for YF, as no follow up trainings by the EPHI  
547 have taken place for newer recruits. Therefore, knowledge levels of healthcare professionals  
548 can be assumed low in the case of a future outbreak.

549  
550 During the entomological investigations, a total of 688 artificial and natural containers were  
551 inspected from across 177 households. Most of the containers were found outside of the home,  
552 and due to the ongoing rains in South Ari, filled with rainwater. None of the kebeles sampled  
553 had piped water, so buckets and drums were often used for water storage. The urban area of  
554 Hana served a larger number of people per household, and therefore stored a larger proportion  
555 of water, increasing the number of potential sites for harbouring immature stages.

556  
557 The main breeding site in Aykamer and Shepe was the false banana plant, a crop found  
558 ubiquitously in South Ari. Traditional practices ensure the plant is cultivated close to the home,  
559 particularly as it requires a larger amount of dung and nutrients than the regular banana plant.  
560 The plant has multiple purposes, including its leaves which are used to transport cabbage to  
561 market and its stem and roots are used as food (the “false banana” that fruits is inedible). In  
562 addition, the plant grows for about 4 years, in comparison to the banana plant which grows,  
563 fruits and dies within a few weeks, providing a longer life-span to act as a mosquito breeding  
564 site. In the hotter and drier months, the water in the large plant stem has previously been  
565 reported to resist evaporation, making mosquito breeding possible all year round (30). A recent  
566 mini-drought in Arkisha resulted in the loss of all false banana plants, however, usually it is  
567 pervasive in this kebele. Therefore, breeding sites described in Arkisha during this study may  
568 not be entirely representative. In addition, previous studies identified the taro plant as an  
569 important breeding site for *Aedes* spp. in East Africa, however, in this study it was often  
570 difficult to isolate water from the plant and only a small number were inspected, therefore its  
571 significance is most probably under-estimated (30).

572  
573 The greatest pupal contribution across the study sites was from clay pots (both used and  
574 discarded) as well as the false banana plant. The clay pots were used for multiple purposes, but  
575 commonly found to store water during house construction or those that were broken and

576 discarded containing rainwater; in the former, as the water was not being consumed, it was left  
577 uncovered. Drums were also often used for water storage; however, most were found negative  
578 for mosquito larvae. One study in Dire Dawa, Ethiopia, found that artificial breeding sites (in  
579 particular tyres and plastic drums) were the primary source of vectors (37,38), however there  
580 sampling was conducted in an urban area. Various studies found differing types of containers  
581 responsible for *Aedes* spp. breeding, such as discarded tyres in Tanzania (39), medium storage  
582 containers in Nigeria (40) and natural sites in Kenya (34,41).

583  
584 Larval entomological surveys were conducted to understand the larval density and mosquito  
585 abundance, to determine the future risk of YFV transmission. In terms of entomological risk  
586 indices, all kebeles except Besheda were above the WHO high risk thresholds for one or more  
587 entomological index, indicating evidence for future local YFV transmission. As previous  
588 studies have reported a number of limitations associated with measuring larval indices, pupal  
589 numbers per person were also calculated (PDI) (42). The PDI was found highest in Aykamer  
590 (2.24), with a strong positive correlation between the AR and PDI ( $r=0.9545$ ,  $p=0.0455$ ), and  
591 therefore it can be considered a significant predictor of YF risk. A higher PDI was also  
592 observed in rural areas, consistent with a previous study of *Ae. aegypti* breeding sites in Kenya  
593 (43).

594  
595 The ITS2 sequencing data from adult *Aedes* captured in and around households in this study,  
596 in comparison with currently available sequences, indicated that they were most closely related  
597 to non-anthropophilic members of the *Ae. simpsoni* complex from Uganda and Nigeria (29).  
598 This complex comprises three known species including *Ae. simpsoni* s.s. *Ae. lili* and *Ae.*  
599 *bromeliae*, of which the latter is considered anthropophilic and has previously been  
600 incriminated as the principle vector of YF epidemics in Ethiopia (16,44)). Adult mosquitoes  
601 collected from SOZ were most likely *Ae. lili* (*Ae. simpsoni* s.s. is confined to southern Africa)  
602 and therefore the lack of detection of any medically important arboviruses which are  
603 transmitted through human blood-feeding would be expected in this species given no females  
604 have been recorded biting humans (29). While *Ae. bromeliae* can breed across varied ecologies,  
605 *Ae. lili* has been sampled from a more restricted range of plant axils (*Musa* spp. *Colocasia*  
606 spp. *Dracena* spp. and *Sansevieria* spp.) and not previously from inside the domestic  
607 environment (45,46). Additional sampling efforts are warranted to identify the vector species  
608 responsible for YFV transmission and its breeding patterns, to further define the local  
609 distribution and ecology of *Ae. lili*, and in particular, the host feeding behaviour of the species  
610 in this specific locality.

611 The KAP survey was completed by an equal split of male and female respondents (43.9% and  
612 56.1% respectively) and the majority did not have or had very little education. Despite this,  
613 good knowledge (53.3%), attitude (78.89%) and practice (70.56%) scores were surprisingly  
614 high across all respondents, which may also be explained by the confusion with, and fear of,  
615 malaria. The results from the study showed that 87.8% of respondents had heard of yellow  
616 fever (Amharic translation: *bicha woba*). However, the direct translation of *bicha* = yellow and  
617 *woba* = malaria, meant the direct translation of *bicha woba* was “yellow malaria” which  
618 resulted in a large amount of confusion between YF and severe malaria. Therefore, if  
619 respondents thought the questionnaire was about severe malaria, information bias would result  
620 in an overestimation of YF knowledge levels. Knowledge levels of general symptoms were  
621 high, while the more specific symptoms were much lower. 57.2% of people thought YF could  
622 be transmitted from person to person, which could be an issue when people are seeking  
623 treatment and likewise when administering care to others. This finding is in agreement with a

624 recent study by Legesse *et al.* (2018) that also found a fairly high percentage (55.9%) of  
625 respondents in SOZ believed YFV could be transmitted through breathing (47).

626 There were high knowledge levels that YFV was transmitted by a mosquito (82.8%), in contrast  
627 to Legesse *et al.* (2018) who found only 37.6% knew YFV was vector-borne. However,  
628 because awareness of malaria transmission by mosquitoes was high, the true knowledge level  
629 may have been overestimated in our study. Knowledge on malaria was not quantitatively  
630 assessed in this study, however, studies by Abate *et al.* (2013) in other parts of Ethiopia showed  
631 85% of respondents to a malaria KAP survey stated its transmission to be by mosquitoes (48).  
632 Only 30.5% knew that the mosquito could bite during the daytime and therefore, many people  
633 may not be adequately protecting themselves from mosquito bites. 81.7% stated that YF was a  
634 serious illness, with reasons including bloody vomiting and problems with the brain, which is  
635 also in agreement with the confusion over YF and severe and/or cerebral malaria.

636 A number of respondents from Arkisha reported knowing someone who had suffered from YF  
637 in 2016 or 2017, or self-reporting having suffered from YF themselves. This is consistent with  
638 the reporting of 22 suspected cases in Arkisha (sub-cluster: Giste) in March 2016 by PHEM  
639 (49). However, according to a Weekly Humanitarian Bulletin for Ethiopia in June 2016, these  
640 cases turned out to be negative (50).

641 The only significant determinants of KAP scores were household location for knowledge score;  
642 vaccination status and household location for attitude score; and vaccination status for practice  
643 scores. As the majority of those vaccinated would have been so in their local kebele health post  
644 by a HEW, they would have also been educated on the disease at this time. Loudspeaker  
645 announcements throughout the kebele told heads of households to come and get their families  
646 vaccinated, rather than actively seeking individuals for vaccination. This suggests those that  
647 were the most active in ensuring the health of their household (measured by self-reported  
648 vaccination status), had the highest KAP levels of YF.

649 In addition, the finding of household location being predictive of the KAP scores was in  
650 agreement with how the respondents gathered their information on YF, with 76.8% reporting  
651 HEWs as their only source. This suggests the odds of having good knowledge; which were  
652 49.0 higher in Arkisha, 32.0 in Aykamer, 25.4 in Hana and 9.7 in Besheda compared to Shepe;  
653 could be explained by how active and knowledgeable the HEWs were in the respective  
654 localities. However, this may also have been influenced by interviewer bias. The same was  
655 seen for attitude levels, with the odds of having a good score higher in other kebeles, compared  
656 to Shepe.

#### 657 658 *Study limitations*

659 There are several weaknesses in the reported study design, which need to be considered when  
660 interpreting the data. The line list of YF cases from the PHEM contained missing data on  
661 symptoms, occupation, travel history or past vaccination history, and therefore, a clinical  
662 epidemiological analysis was not conducted and the scope for YF risk factor analysis was  
663 limited. Regarding entomological indices, cross-sectional sampling was undertaken and thus it  
664 was not possible to assess the relative importance of each breeding site over time or with  
665 respect to the rainy season; nor was it logistically feasible to extend mosquito collections to the  
666 forest, to improve our understanding of local sylvatic YFV transmission. It was also not  
667 possible to retrieve historical climatic data during the YFV outbreak period, which could have  
668 helped to identify environmental risk factors for this outbreak. Due to the relatively low  
669 numbers of mosquito species collected, it was not possible to identify the vector species  
670 responsible for YFV transmission nor successfully detect any arboviruses within sampled

671 mosquitoes. Migrant workers and nomadic populations may not have been captured within this  
672 study due to the time of day in which the questionnaires were completed, and therefore a follow  
673 up survey should be conducted, also including those working for the Omo Kuraz Sugar Factory  
674 in Salamago. All interviews were conducted by the HEWs in the language most comfortable  
675 to the interviewee. However, in each kebele we worked with different HEWs to ensure  
676 community acceptability, but this may have introduced interview bias when completing the  
677 questionnaire, translating and interpreting answers. Due to small numbers of participants from  
678 each kebele, data were pooled for analysis; however, this may have concealed variations in  
679 KAP level by location, therefore multivariate analysis was performed to account for this.  
680 Finally, self-reporting of vaccination status also introduced an unascertainable amount of recall  
681 bias, but unfortunately, vaccination cards were not provided during the mass campaign.

682

### 683 *Conclusions*

684 Despite YFV re-emerging in recent years, little research has been conducted across endemic  
685 countries to understand the risk for further outbreaks. This study suggests that following an  
686 outbreak in 2012-2014, the SOZ area in southwestern Ethiopia still remains at risk for future  
687 YFV transmission. With the high density of *Aedes* mosquitoes breeding close to human  
688 habitats, and relatively low community knowledge levels of YF prevention methods, study  
689 findings highlight the importance of providing information to these at-risk communities.  
690 Further research needs to be conducted in the surrounding areas, to identify the major vector  
691 species of YFV, to understand the local sylvatic YFV transmission in forest areas and to further  
692 define the local distribution of *Ae. simpsoni* complex mosquitoes. Follow-up vaccination  
693 campaigns should be considered to target remaining pockets of potential unvaccinated  
694 populations, in parallel to introduction of the vaccination into the country's national childhood  
695 immunization regimen. Future training of HEWs and health professionals is necessary to  
696 ensure sustained high knowledge of both professionals and the community. Overall, study  
697 results emphasise the need to strengthen local and national disease surveillance and in-country  
698 laboratory capacity to ensure more rapid detection and response to future outbreaks.

699

### 700 **Abbreviations**

701 Attack Rate (AR)

702 Breteau Index (BI)

703 Case Fatality Rate (CFR)

704 Chikungunya virus (CHIKV)

705 Container Index (CI)

706 Dengue virus (DENV)

707 Eliminating Yellow Fever Epidemics (EYE)

708 Ethiopian Public Health Institute (EPHI)

709 Health Extension Worker (HEW)

710 Household Index (HI)

711 Knowledge, Attitudes and Practices (KAP)

712 Public Health Emergency Management (PHEM)

713 Pupal Demographic Index (PDI)

714 Rift Valley fever virus (RVFV)

715 South Omo Zone (SOZ)

716 Southern Nations, Nationalities, and People's Region (SNNPR)

717 West Nile virus (WNV)

718 World Health Organization (WHO)

719 Yellow fever (YF)

720 Yellow fever virus (YFV)

721 Zika virus (ZIKV)

722

723

## 724 Acknowledgements

725

726 We would like to thank Dr Seth Irish for his continued support, expert knowledge and guidance  
727 throughout the entirety of the project. We would like to thank Siraj, Sintayheu and Getinet  
728 from the Centre for Public Health Laboratory, Jinka, Ethiopia and Johannis Negash from Public  
729 Health Emergency Management (PHEM) for their support, guidance and logistics during the  
730 field study. We would like to thank Cheryl Whitehorn for her support in morphological  
731 identification, and Yvonne Linton from Walter Reed Biosystematics Unit at the Smithsonian  
732 Institution for providing control mosquito samples. Finally, we would like to thank all those  
733 from South Omo Zone who agreed to participate in this study.

734

735

## 736 References

- 737 1. Monath TP, Vasconcelos PFC. Yellow fever. *J Clin Virol* [Internet]. Elsevier B.V.;  
738 2015;64:160–73. Available from: <http://dx.doi.org/10.1016/j.jcv.2014.08.030>
- 739 2. Garske T, Van Kerkhove MD, Yactayo S, Ronveaux O, Lewis RF, Staples JE, et al.  
740 Yellow Fever in Africa: Estimating the Burden of Disease and Impact of Mass  
741 Vaccination from Outbreak and Serological Data. *PLoS Med*. 2014;11(5).
- 742 3. Chan M. Yellow fever: The resurgence of a forgotten disease. *Lancet* [Internet]. World  
743 Health Organization. Published by Elsevier Ltd/Inc/BV. All rights reserved.;  
744 2016;387(10034):2165–6. Available from: [http://dx.doi.org/10.1016/S0140-](http://dx.doi.org/10.1016/S0140-6736(16)30620-1)  
745 [6736\(16\)30620-1](http://dx.doi.org/10.1016/S0140-6736(16)30620-1)
- 746 4. Zhao S, Stone L, Gao D, He D. Modelling the large-scale yellow fever outbreak in  
747 Luanda, Angola, and the impact of vaccination. *PLoS Negl Trop Dis*. 2018;12(1):1–  
748 24.
- 749 5. Kraemer MUG, Faria NR, Reiner RC, Golding N, Nikolay B, Stasse S, et al. Spread of  
750 yellow fever virus outbreak in Angola and the Democratic Republic of the Congo  
751 2015–16: a modelling study. *Lancet Infect Dis* [Internet]. The Author(s). Published by  
752 Elsevier Ltd. This is an Open Access article under the CC BY license;  
753 2016;17(3):330–8. Available from:  
754 <http://linkinghub.elsevier.com/retrieve/pii/S1473309916305138>
- 755 6. World Health Organization (WHO). Weekly epidemiological record. *Wkly Epidemiol*  
756 *Rec* [Internet]. 2017;92(32):437–42. Available from:  
757 [http://search.ebscohost.com/login.aspx?direct=true&db=cin20&AN=124595795&site](http://search.ebscohost.com/login.aspx?direct=true&db=cin20&AN=124595795&site=ehost-live)  
758 [=ehost-live](http://search.ebscohost.com/login.aspx?direct=true&db=cin20&AN=124595795&site=ehost-live)
- 759 7. Cavalcante KRLJ, Tauil PL, Cavalcante KRLJ, Tauil PL. Risco de reintrodução da  
760 febre amarela urbana no Brasil. *Epidemiol e Serviços Saúde* [Internet].  
761 2017;26(3):617–20. Available from:  
762 [http://revista.iec.gov.br/template\\_doi\\_ess.php?doi=10.5123/S1679-](http://revista.iec.gov.br/template_doi_ess.php?doi=10.5123/S1679-49742017000300617&scielo=S2237-96222017000300617)  
763 [49742017000300617&scielo=S2237-96222017000300617](http://revista.iec.gov.br/template_doi_ess.php?doi=10.5123/S1679-49742017000300617&scielo=S2237-96222017000300617)
- 764 8. Baba MM, Ikusemoran M. Is the absence or intermittent YF vaccination the major  
765 contributor to its persistent outbreaks in eastern Africa? *Biochem Biophys Res*  
766 *Commun* [Internet]. Elsevier Ltd; 2017;1–10. Available from:  
767 <http://dx.doi.org/10.1016/j.bbrc.2017.01.079>
- 768 9. The Lancet. Yellow fever: a major threat to public health. *Lancet* [Internet]. Elsevier  
769 Ltd; 2018;391(10119):402. Available from:  
770 <http://linkinghub.elsevier.com/retrieve/pii/S0140673618301521>

- 771 10. Shearer FM, Longbottom J, Browne AJ, Pigott DM, Brady OJ, Kraemer MUG, et al.  
772 Existing and potential infection risk zones of yellow fever worldwide: A modelling  
773 analysis. *Lancet Glob Heal*. 2018;270–8.
- 774 11. Wilder-Smith A, Monath TP. Responding to the threat of urban yellow fever  
775 outbreaks. *Lancet Infect Dis* [Internet]. The Author(s). Published by Elsevier Ltd. This  
776 is an Open Access article under the CC BY license; 2017;17(3):248–50. Available  
777 from: [http://dx.doi.org/10.1016/S1473-3099\(16\)30588-6](http://dx.doi.org/10.1016/S1473-3099(16)30588-6)
- 778 12. Hamrick PN, Aldighieri S, Machado G, Leonel DG, Vilca LM, Uriona S, et al.  
779 Geographic patterns and environmental factors associated with human yellow fever  
780 presence in the Americas. *PLoS Negl Trop Dis*. 2017;11(9):1–27.
- 781 13. World Health Organization (WHO). Recommended standards for surveillance of  
782 selected vaccine-preventable diseases. WHO. 2003;
- 783 14. Ardoin P, Rodhain F, Hannoun C. Epidemiologic study of arboviruses in the Arba-  
784 Minch district of Ethiopia. *Trop Geogr Med* [Internet]. 1976;28(4):309–15. Available  
785 from: <http://www.ncbi.nlm.nih.gov/pubmed/13526>
- 786 15. World Health Organization (WHO). Eliminate Yellow fever Epidemics (EYE): a  
787 global strategy, 2017–2026. *Wkly Epidemiol Rec*. 2017;92:193–204.
- 788 16. Lilay A, Asamene N, Bekele A, Mengesha M, Wendabeku M, Tareke I, et al.  
789 Reemergence of yellow fever in Ethiopia after 50 years, 2013: Epidemiological and  
790 entomological investigations. *BMC Infect Dis*. *BMC Infectious Diseases*;  
791 2017;17(1):2–7.
- 792 17. HOPKINS GH. Mosquitoes of the Ethiopian Region. 2nd ed. 1952.
- 793 18. Ward RA. A pictorial key for the identification of the mosquitoes associated with  
794 Yellow Fever in Africa. 1981;13(2):138–49.
- 795 19. World Health Organization (WHO). Technical guide for system of yellow fever  
796 surveillance. 1971;
- 797 20. Focks DA. A Review of Entomological Sampling Methods and Indicators for Dengue  
798 Vectors. UNICEF, UNDP, World Bank, WHO Spec Program Res Train Trop Dis.  
799 2003;
- 800 21. Beebe NW, Saul A. Discrimination of all members of the *Anopheles Punctulatus*  
801 complex by Polymerase Chain Reaction Fragment Length Polymorphism Analysis.  
802 1995;5–8.
- 803 22. Kumar S, Stecher G, Tamura K. MEGA7 : Molecular Evolutionary Genetics Analysis  
804 Version 7 . 0 for Bigger Datasets. 1874;33(7):1870–4.
- 805 23. Tamura K, Nei M. Estimation of the Number of Nucleotide Substitutions in the  
806 Control Region of Mitochondrial DNA in Humans and. 1993;10(April).
- 807 24. Shuaib F, Todd D, Campbell-Stennett D, Ehiri J, Jolly PE. Knowledge, attitudes and  
808 practices regarding dengue infection in Westmoreland, Jamaica. *West Indian Med J*.  
809 2010;59(2):139–46.
- 810 25. Dhimal M, Aryal KK, Dhimal ML, Gautam I, Singh SP, Bhusal CL, et al. Knowledge,  
811 attitude and practice regarding dengue fever among the healthy population of highland  
812 and lowland communities in Central Nepal. *PLoS One*. 2014;9(7).
- 813 26. Dias MAB, Domingues RMSM, Schilithz AOC, Nakamura-Pereira M, do Carmo Leal  
814 M, M.A.B. D, et al. Factors associated with cesarean delivery during labor in  
815 primiparous women assisted in the Brazilian Public Health System: Data from a  
816 National Survey [Internet]. *Reproductive Health M.A.B. Dias, Instituto Fernandes*  
817 *Figueira/FIOCRUZ, Av. Rui Barbosa 716, Rio de Janeiro CEP: 22250-020, Brazil. E-*  
818 *mail: marcosad@iff.fiocruz.br: BioMed Central Ltd. (E-mail:*  
819 *info@biomedcentral.com); Oct 17, 2016 p. no pagination. Available from:*  
820 <http://www.reproductive-health-journal.com/home/>

- 821 27. World Health Organization (WHO). Knowledge , Attitudes and Practice surveys Zika  
822 virus disease and potential complications Resource pack. 2016;27. Available from:  
823 [http://apps.who.int/iris/bitstream/10665/204689/1/WHO\\_ZIKV\\_RCCE\\_16.2\\_eng.pdf](http://apps.who.int/iris/bitstream/10665/204689/1/WHO_ZIKV_RCCE_16.2_eng.pdf)  
824 28. World Health Organization (WHO). Emergencies preparedness, response Yellow fever  
825 in Ethiopia [Internet]. Disease Outbreak News. 2016. p. 11–4. Available from:  
826 <http://www.who.int/csr/don/13-april-2016-yellow-fever-angola/en/>  
827 29. Mukwaya LG, Kayondo JK, Crabtree MB, Savage HM, Biggerstaff BJ, Miller BR.  
828 Genetics differentiation on the yellow fever virus vector, aedes simpsoni complex, in  
829 africa: sequence variation in the ribosomal dna internal transcribed spacers of  
830 anthropophilic populations. *Insect Mol Biol*. 2000;9(1):85–91.  
831 30. Serie C, Andral L, Lindrec A, Neri P. Epidemie de fièvre jaune en Ethiopie (1960-  
832 1962) Observations preliminaires. 1964;299–319.  
833 31. Andral L, Poirier A, Lindrec A, Neri P. Etudes sur la fièvre jaune en Ethiopie 6. Etude  
834 epidemiologique. 1968;879–84.  
835 32. Wamala JF, Malimbo M, Okot CL, Atai-Omoruto AD, Tenywa E, Miller JR, et al.  
836 Epidemiological and laboratory characterization of a yellow fever outbreak in northern  
837 Uganda, October 2010-January 2011. *Int J Infect Dis* [Internet]. International Society  
838 for Infectious Diseases; 2012;16(7):e536–42. Available from:  
839 <http://dx.doi.org/10.1016/j.ijid.2012.03.004>  
840 33. Abdulwahab Alhakimi H, Jadallah O, Khojaly H, Ahmad Omar Arafa K, Amen  
841 Ahmed W. Epidemiological, Clinical and Entomological Characteristics of Yellow  
842 Fever Outbreak in Darfur 2012. *AIMS Public Heal* [Internet]. 2015;2(1):132–41.  
843 Available from: <http://www.aimspress.com/article/10.3934/publichealth.2015.1.132>  
844 34. Reiter P, Cordellier R, Ouma JO, Cropp CB, Savage HM, Sanders EJ, et al. First  
845 Recorded Outbreak of Yellow Fever in Kenya, 1992-1993. *Entomologic*  
846 *Investigations*. *Am J Trop Med Hyg*. 1998;59(4):650–6.  
847 35. Etsehiwot Zemelak. Field Epidemiology Training Program (EFETP): Compiled Body  
848 of Works in Field Epidemiology. 2014;  
849 36. Gardner CL, Ryman KD, Genetics M. Yellow Fever: A reemerging threat.  
850 2015;30(1):237–60.  
851 37. Getachew D, Tekie H, Gebre-michael T, Balkew M, Mesfin A. Breeding Sites of  
852 Aedes aegypti : Potential Dengue Vectors in Dire Dawa , East Ethiopia. 2015;2015.  
853 38. Woyessa AB, Mengesha M, Kassa W, Kifle E, Wondabeku M, Girmay A. Original  
854 article The first acute febrile illness investigation associated with dengue fever in  
855 Ethiopia , 2013 : A descriptive analysis. 2013;  
856 39. Philbert A, Ijumba JN. Preferred breeding habitats of Aedes Aegypti (diptera-  
857 cuilcidae) mosquito and its public health implications in Dar es Salaam, Tanzania. *J*  
858 *Environ Res Manag* [Internet]. 2013;4(10):0344–51. Available from:  
859 [http://www.e3journals.org/cms/articles/1387369464\\_Philbert and Ijumba.pdf](http://www.e3journals.org/cms/articles/1387369464_Philbert and Ijumba.pdf)  
860 40. Agwu EJ, Igbiosa IB, Isaac C. Entomological assessment of yellow fever-epidemic  
861 risk indices in Benue State, Nigeria, 2010-2011. *Acta Trop* [Internet]. Elsevier B.V.;  
862 2016;161:18–25. Available from: <http://dx.doi.org/10.1016/j.actatropica.2016.05.005>  
863 41. Deming R, Manrique-Saide P, Medina Barreiro A, Cardeña EUK, Che-Mendoza A,  
864 Jones B, et al. Spatial variation of insecticide resistance in the dengue vector Aedes  
865 aegypti presents unique vector control challenges. *Parasit Vectors* [Internet]. *Parasites*  
866 *& Vectors*; 2016;9(1):67. Available from:  
867 <http://www.parasitesandvectors.com/content/9/1/67>  
868 42. Focks DA, Chadee DD. Pupal survey: An epidemiologically significant surveillance  
869 method for Aedes aegypti: An example using data from Trinidad. *Am J Trop Med*  
870 *Hyg*. 1997;56(2):159–67.



- 871 43. Midega JT, Nzovu J, Kahindi S, Sang RC, Mbogo C. Application of the  
872 pupal/demographic-survey methodology to identify the key container habitats of *Aedes*  
873 *aegypti* (L.) in Malindi district, Kenya. *Ann Trop Med Parasitol* [Internet].  
874 2006;100(sup1):61–72. Available from:  
875 <http://www.tandfonline.com/doi/full/10.1179/136485906X105525>  
876 44. Rogers DJ, Wilson a J, Hay SI, Graham a J. The Global Distribution of Yellow Fever  
877 and Dengue. *Race*. 2011;(5):1–32.  
878 45. Huang Y, Project ME. U(3) 1979 221 *Aedes* (*Stegomyia*) *simpsoni*. 1979;(3).  
879 46. Huang Y-M. *Aedes* (*Stegomyia*) *Bromeliae* (Diptera: Culicidae), the Yellow Fever  
880 Virus Vector in East Africa. *J Med Entomol* [Internet]. 1986;23(2):196–200. Available  
881 from:  
882 <http://www.ingentaconnect.com/content/esa/jme/1986/00000023/00000002/art00015>  
883 47. Legesse M, Endale A, Erku W, Tilahun G, Medhin G. Community knowledge ,  
884 attitudes and practices on Yellow fever in South Omo area , Southern Ethiopia.  
885 2018;1–13.  
886 48. Abate A, Degarege A, Erko B. Community knowledge, attitude and practice about  
887 malaria in a low endemic setting of Shewa Robit Town, northeastern Ethiopia. *BMC*  
888 *Public Health*. 2013;13(1):1–8.  
889 49. Abyot Kebele. *Weekly Epidemiological Bulletin: Ethiopian Public Health Institute*  
890 *Center for Public Health Emergency Management*. 2016.  
891 50. OCHA. *Weekly Humanitarian Bulletin: Ethiopia*. 2016;(June):2016.

892  
893

#### 894 **Supporting Information Legends**

895  
896  
897  
898  
899

- Supplementary File S1: Arbovirus screening assays including PCR primer/probes sequences  
and cycling conditions.  
Supplementary File S2: Household questionnaire: English version.  
Supplementary File S3: STROBE checklist.

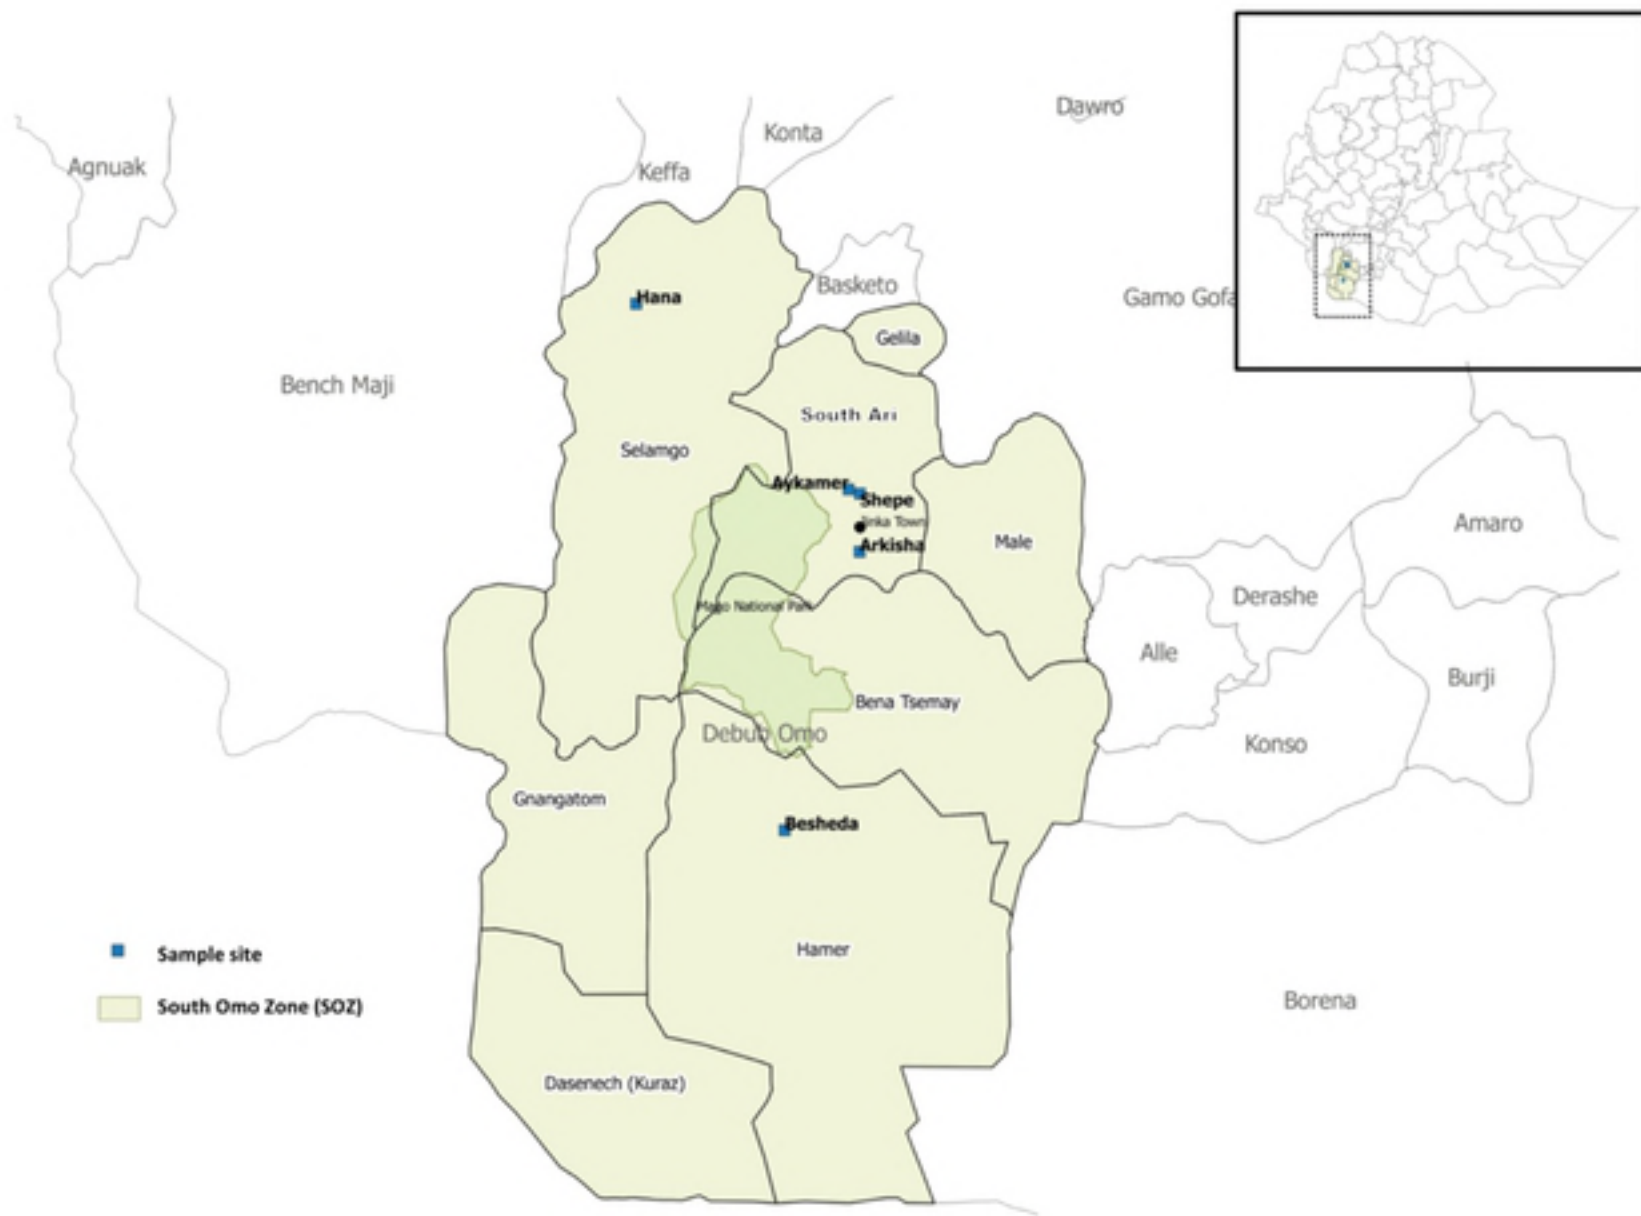

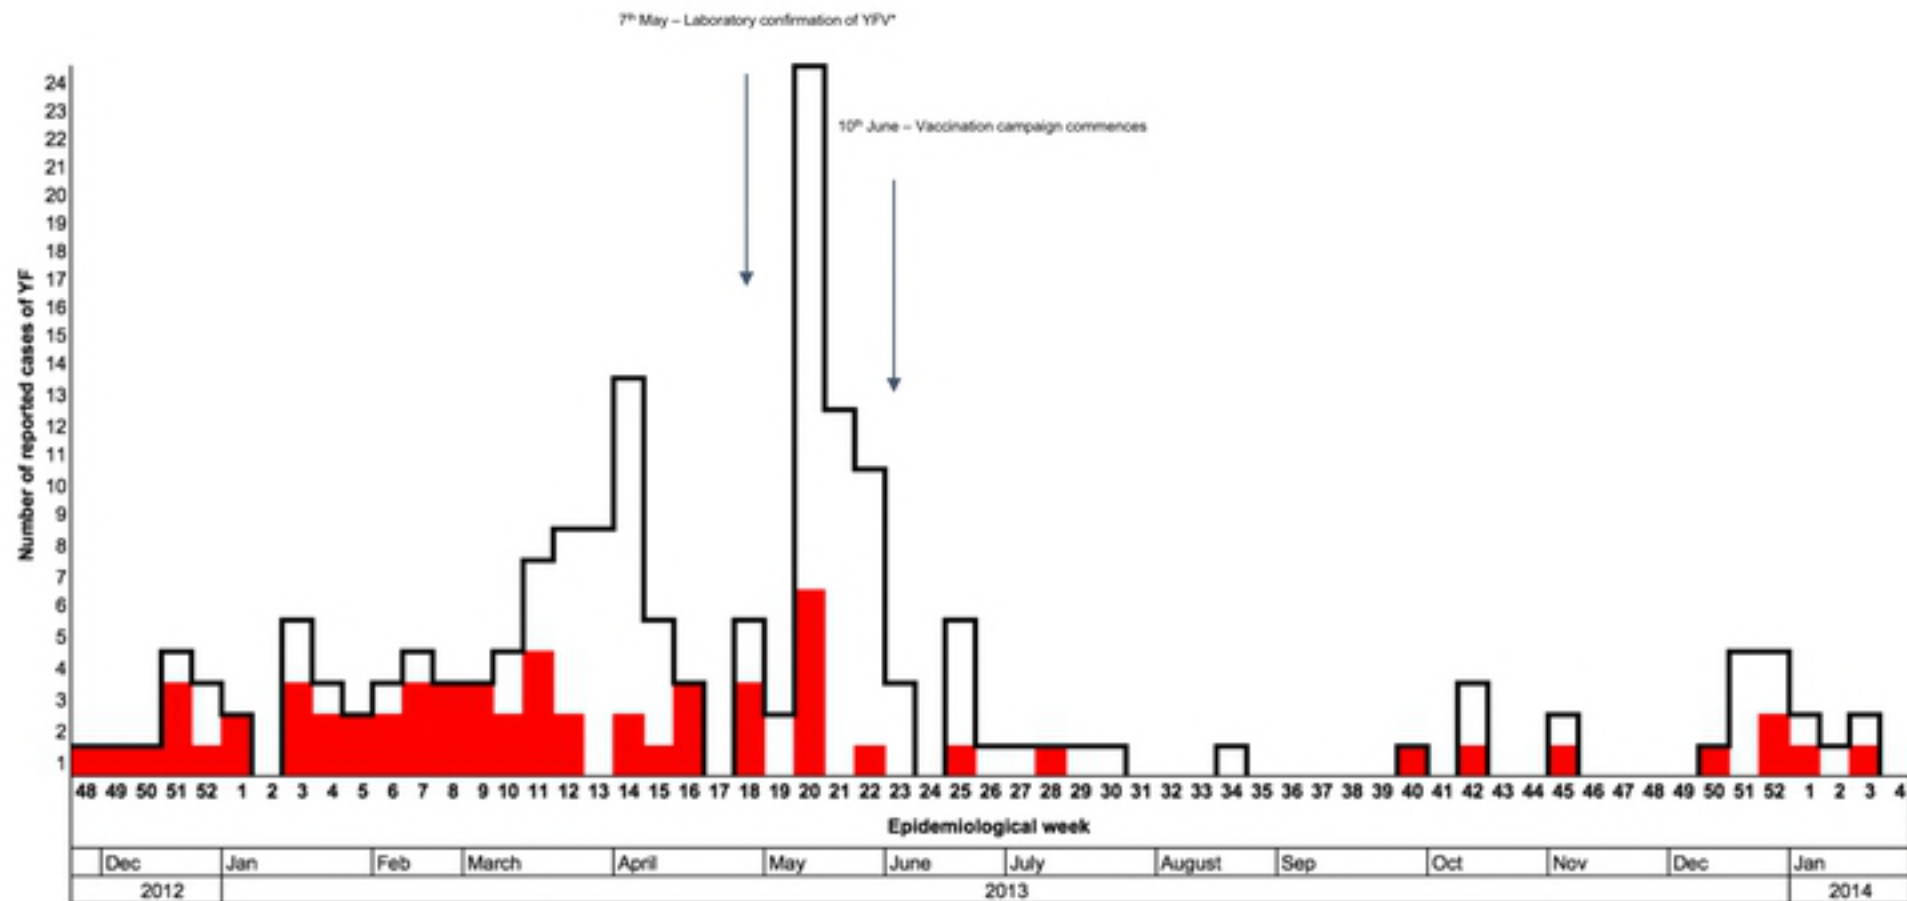

Reported case (alive)  
 Reported case (dead)

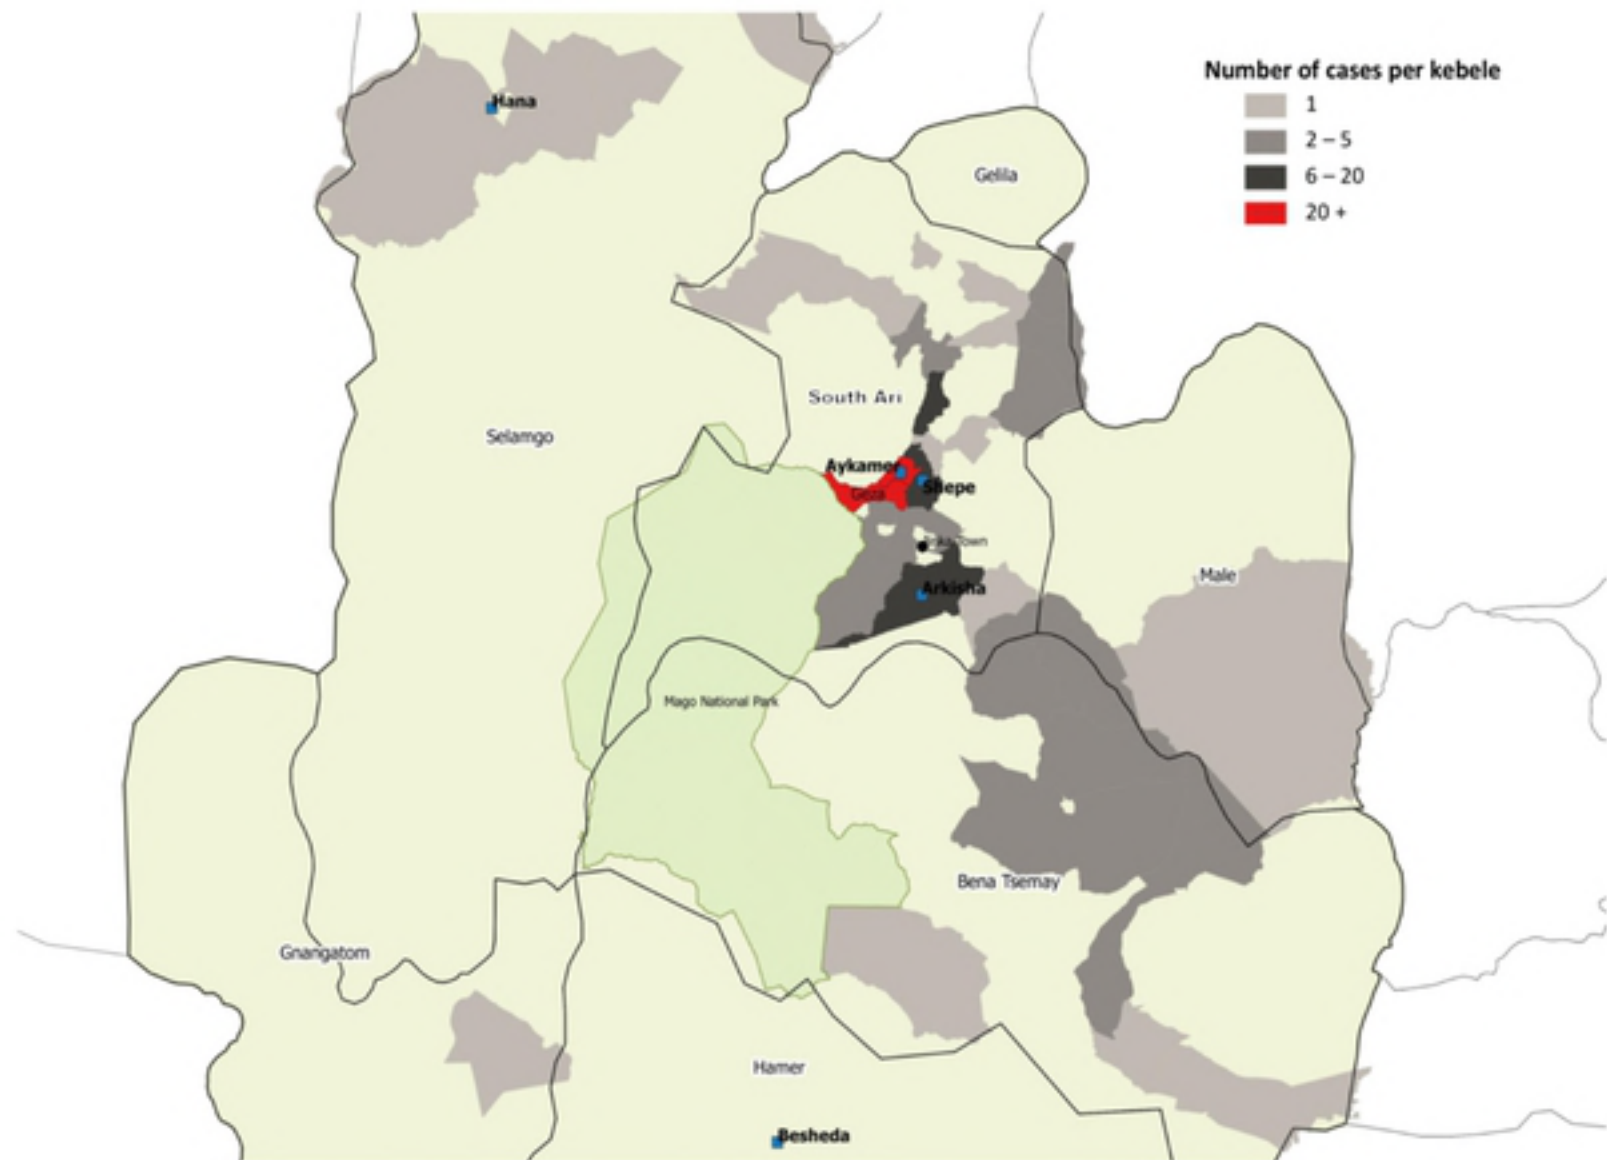

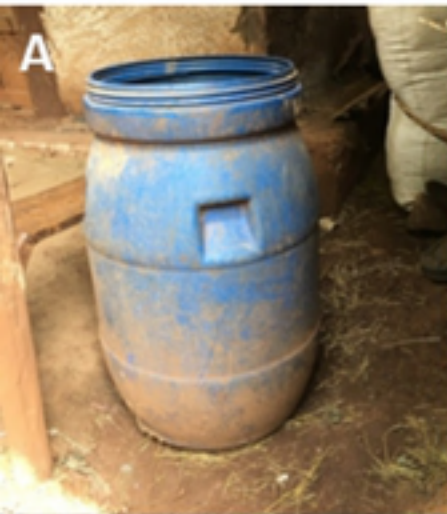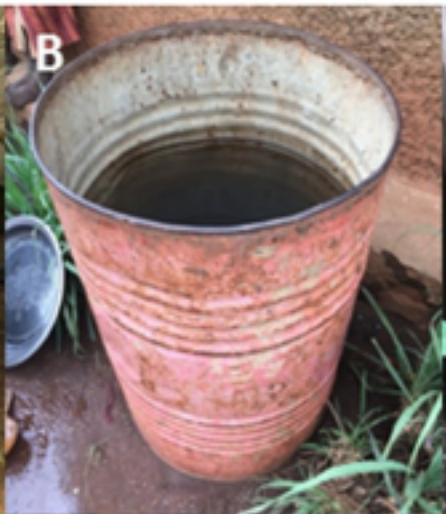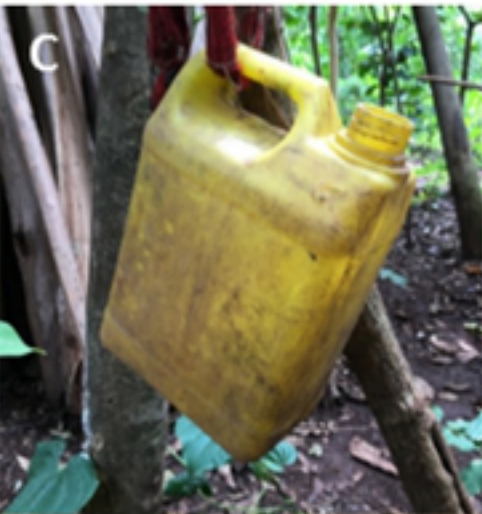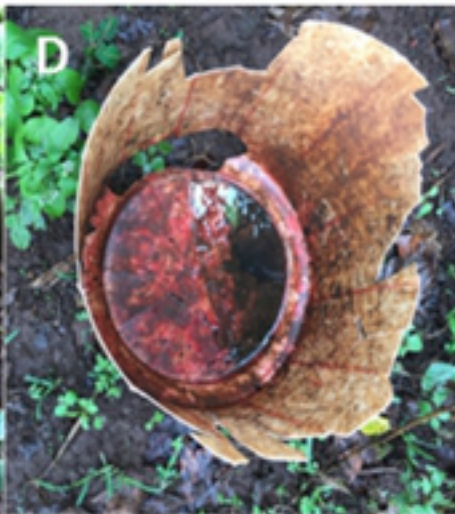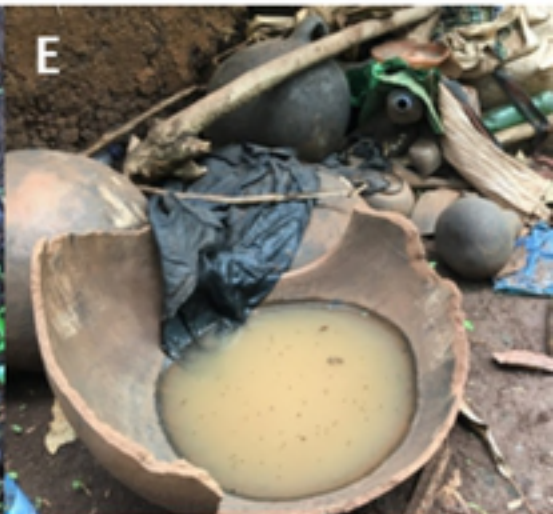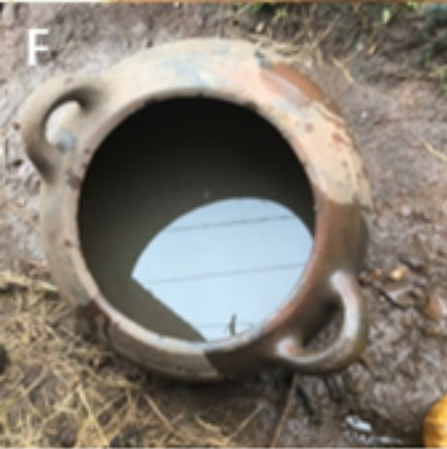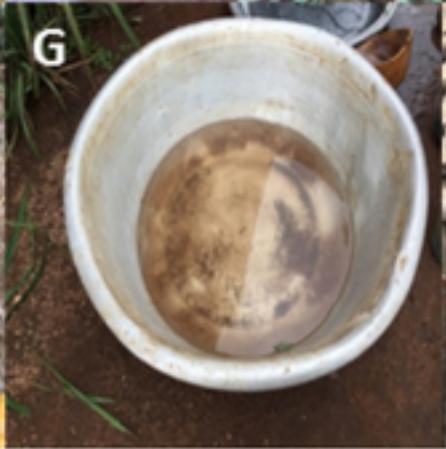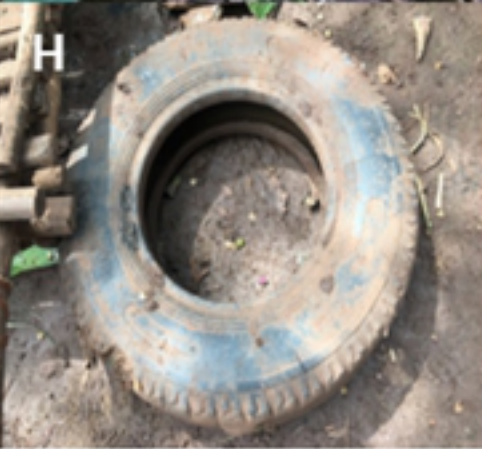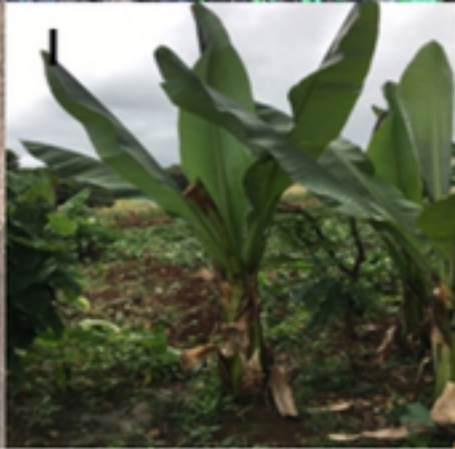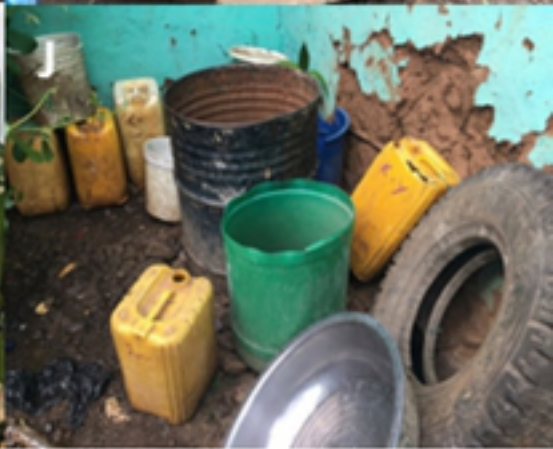

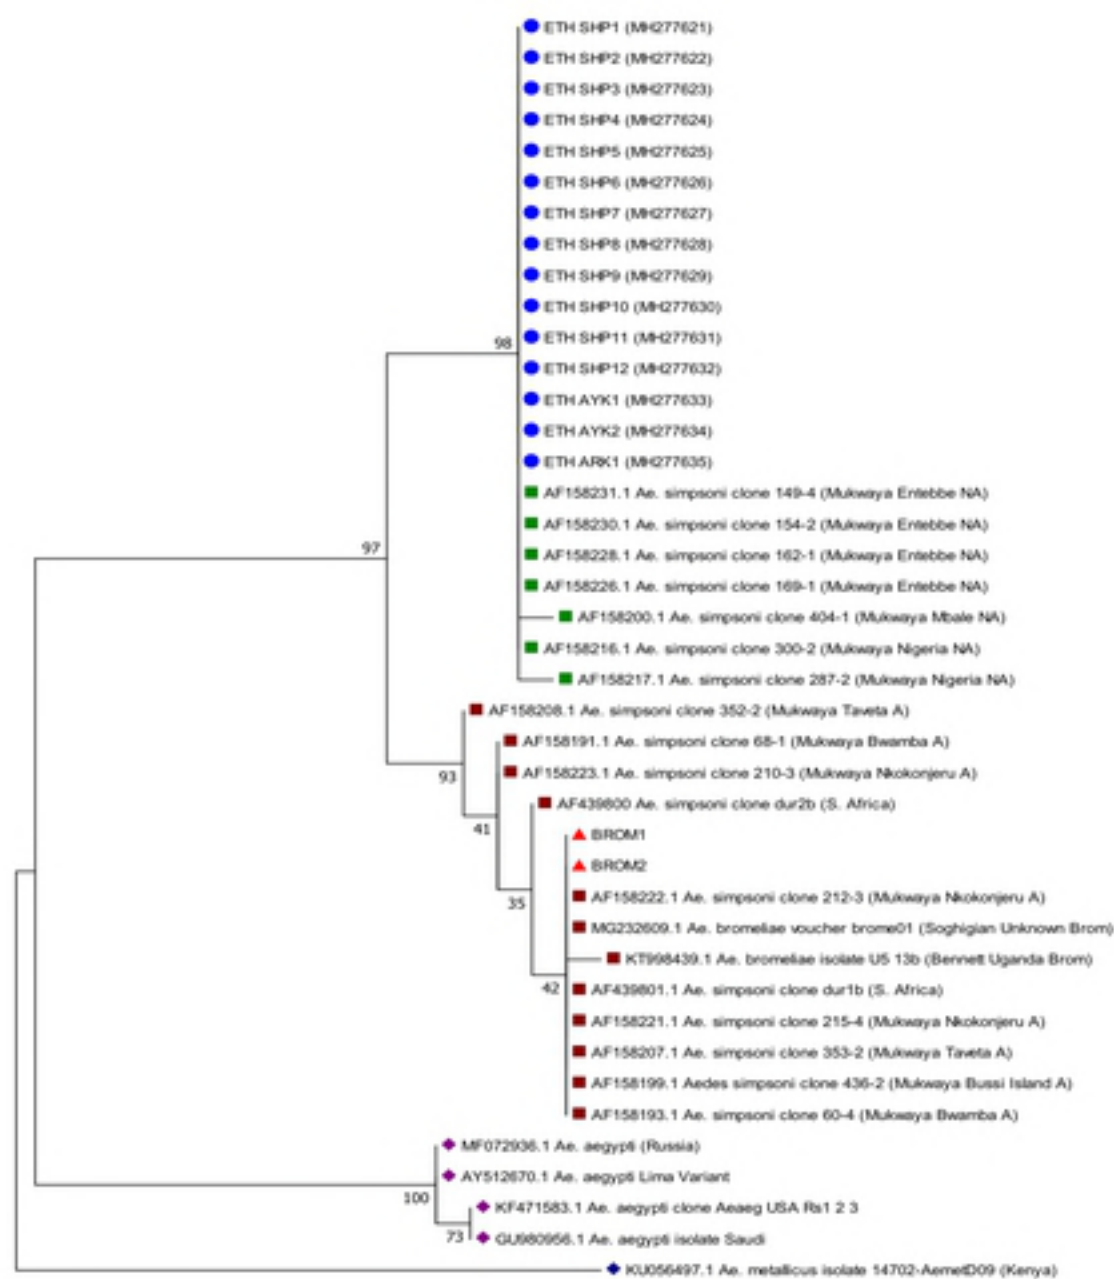

0.01
